1

2 **Title:**

3 **A systematic screen of breast cancer patients' exomes**  
4 **for retrotransposon insertions reveals disease**  
5 **associated genes**

6

7

8 **Authors:**

9 **Sylvia De Brakeleer, Jacques De Grève and Erik Teugels\***

10

11

12 **Affiliation:**

13 **Laboratory of Molecular and Medical Oncology**

14 **Vrije Universiteit Brussel**

15 **Laarbeeklaan 103, 1090 Brussels**

16 **Belgium**

17

18

19 **Email addresses:**

20 **Sylvia De Brakeleer**                      **sylvia.debrakeleer@gmail.com**

21 **Jacques De Grève**                        **Jacques.DeGreve@uzbrussel.be**

22 **Erik Teugels**                                **eteugels@vub.be**

23

24

25 **\*corresponding author**

26

27 **ABSTRACT**

28 **Background:** Retrotransposons are genetic elements that jump within the genome via an RNA  
29 intermediate. Although they had a strong impact on human genome evolution, only a very tiny  
30 fraction of them can be reactivated nowadays, most often with neutral or detrimental  
31 consequences. The pathological outcomes associated with such genetic alterations are poorly  
32 investigated in the clinic, merely due to their difficult detection.

33 **Results:** We developed a strategy to detect rare retrotransposon mediated insertions in Whole  
34 Exome Sequencing data from 65 familial breast cancer patients. When restricting our search to  
35 high confidence retrotransposition events occurring in less than 10% of the samples, we  
36 identified only ten different Alu elements, two L1 elements, one SVA and two processed  
37 pseudogenes. Only two of these insertions occurred within protein coding sequences and  
38 interestingly, several of the targeted genes have been previously linked to cancer, in three cases  
39 even to increased breast cancer risk (*GHR*, *DMBT1* and *NEK10*). When investigating the  
40 molecular consequences of four Alu insertions at the mRNA level, we found that the element  
41 present in the 3'UTR of *GHR* repressed expression of the corresponding allele. Moreover, the  
42 analysis of a near exonic Alu insertion in *PTPN14* (a mediator of *P53* tumor suppressor activity)  
43 revealed that this gene was imprinted and that the presence of an intronic Alu element can lead to  
44 loss of imprinting.

45 **Conclusions:** Our data underline the relevance of incorporating the search for uncommon  
46 retrotransposition events in Next Generation Sequencing pipelines when analyzing patients with  
47 a suspected genetic disease.

48

49 **KEYWORDS:** retrotransposition, Alu, L1, pseudogene, breast cancer predisposition, exome,  
50 *GHR, PTPN14, ZNF442, Clorf194*

51

52

### 53 **BACKGROUND**

54 More than 50% of the human genome is built up with sequences that originated from the activity  
55 of transposable elements[1], mainly retrotransposons which are able to move to new locations in  
56 the genome via an RNA intermediate using the copy/paste principle[2-4]. L1 retrotransposons  
57 belong to the LINE (long interspersed element) superfamily and are the only transposons still  
58 active in human. Full length L1 elements (~6kb long) code for the proteins necessary for  
59 retrotransposition, including a reverse transcriptase. Although L1 sequences represent about 17%  
60 of the human genome, only a very small fraction of them (80-100 copies) retained their  
61 transposition capacity[5, 6]. Alu and SVA retrotransposons (about 300 and 1400bp long  
62 respectively) are SINEs (short interspersed elements) and do not code for proteins. Rather, they  
63 are fully dependent on L1 retrotransposition and parasitize its propagation system. Accidentally,  
64 cellular RNA can also misuse the L1 retrotransposition machinery resulting in the generation of  
65 processed pseudogenes[7]. The CpG rich sequences present in L1 promoters, Alu and SVA  
66 elements are sites for DNA methylation and heterochromatin formation, causing epigenetic  
67 silencing[8]. Interestingly, the vast majority of evolutionary stabilized Alu insertions are  
68 located in gene-rich regions. They are often embedded in sequences encoding pre-mRNAs or  
69 mature mRNAs, usually as part of their introns or UTRs where they can potentially contribute to  
70 transcriptome variation[9].

71 In 1985 the first de novo Alu element insertion was reported in a B cell lymphoma[10]. Three  
72 years later, Kazazian et al.[11] reported a Haemophilia A causing L1 element insertion in  
73 germline DNA. In a review article published in 2016[6], the list of retrotransposons associated  
74 with human diseases counts 124 entries. Obviously, the number of disease causing  
75 retrotransposition events identified in human[12] is increasing steadily, but the attention these  
76 mutations receive in the clinic is still very poor when compared to classical mutational events  
77 (nucleotide substitutions and small insertions/deletions). When searching for breast cancer (BC)  
78 predisposing mutations in high risk families, we previously identified one Alu insertion in exon  
79 11 of *BRCA1* and one Alu insertion in exon 3 of the *BRCA2* gene[13], this last one appeared later  
80 on to be a recurrent founder mutation restricted to the Portuguese population[14]. When Next  
81 Generation Sequencing tools were introduced in the diagnostic field, only few labs adapted their  
82 IN SILICO pipeline to allow the identification of pathogenic retrotransposition events in the  
83 genes they analyze[15, 16]. In the present work, we developed a strategy allowing the detection  
84 of uncommon retrotransposition events in Whole Exome Sequencing (WES) data using BAM  
85 files generated from a cohort of familial breast cancer patients previously used to identify more  
86 classical cancer predisposing mutations[17]. In a second step, we investigated the molecular  
87 consequences generated by 5 candidate pathogenic Alu insertions revealed during our screen,  
88 and highlight the relevance of screening for rare retrotransposition events in the clinical context.

89

90

## 91 **RESULTS**

92

### 93 **IN SILICO screen for retrotransposition mediated insertions**

94 Because of their shared mechanisms of transposition using an RNA molecule as intermediate,  
95 retrotransposons all bear a long polyA tail at their 3' extremity. Also, their specific mechanism  
96 for insertion into the target DNA results in the duplication of a short sequence at the position  
97 where the retrotransposon has integrated. This duplicated sequence (called Target Site  
98 Duplication or TSD) is usually between 4 and 20 nucleotides long and flanks the retrotransposon  
99 specific sequences. We exploited those two characteristics to identify retrotransposon insertions  
100 not present in the human reference genome (hg19) using WES data generated with the SeqCap  
101 EZ Exome v3.0 kit from Roche. Paired-end sequencing usually generates read pairs that  
102 perfectly map in close proximity on a reference genome. However, the presence of a non-  
103 reference retrotransposon insertion will result in read pairs that do not map closely (Figure1). We  
104 selected these discordantly mapped read pairs by applying the open-source RetroSeq  
105 software[18] on the BAM files previously obtained from 65 BC patients[17] (positive *BRCAl*  
106 control included), with a first additional restriction that one read of the discordantly mapped read  
107 pairs must harbor a long polyA stretch. On average, we obtained 987 candidate insertions for  
108 each patient. When introducing additional filtering steps (using an Excel program) to remove  
109 false positives and frequently occurring non reference polymorphic insertions, we ended with a  
110 list counting only 32 different candidate polyA containing insertion sites for the pooled 65  
111 patients (Additional file 1). A detailed description of our detection strategy and its application on  
112 a positive control sample is presented in the Method section, wherein we also compare two  
113 widely used exome enrichment kits.

114

### 115 **High confident retrotransposition mediated insertions**

116 When performing a manual selection (using the Integrative Genomics Viewer: IGV[19]) for the  
117 presence of a TSD on the 32 polyA containing insertions we had identified, we ended up with 18  
118 high confidence candidates retrotransposon insertions (Table 1). The further characterization of  
119 these retrotransposition mediated insertions (12 Alu, 2 L1, 1 SVA and 3 pseudogenes, see Table  
120 1) was made possible by the presence of a stretch of nucleotides (maximum ~50bp long) in a  
121 fraction of the aligned read pairs that do not match with the reference sequence, but  
122 corresponded the 5' extremity of the inserted sequence. These sequences could be identified  
123 using available web tools (see Methods). A representative screenshot showing the outcome of an  
124 IGV analysis of the genomic region wherein the Alu element integrated into the BRCA1 gene of  
125 our positive control sample is presented in Figure 2. Only 2 out of the 18 retrotransposon  
126 mediated events occurred within protein coding regions (Alu element in *ZNF442* and *UQCR10*  
127 transcript in *Clorf194*, see Table 1) which might be surprising since WES probes are expected to  
128 be specifically designed towards exonic sequences. Indeed, according to the kit provider (Roche)  
129 only protein coding parts of the transcripts are targeted, but for exons that are smaller than 100  
130 bp, the target region is extended to 100 bp. Nevertheless, we expect that the large majority of  
131 retrotransposition mediated insertions occurring in the well covered protein coding regions will  
132 be picked up with our screen, their low incidence being in agreement with the literature[5, 20,  
133 21]. Conversely, we are convinced that a significant fraction of the polymorphic retrotransposons  
134 located in the vicinity of protein coding regions (regions often poorly or not covered at all by  
135 WES) is missed with our WES based approach, although the large majority of identified  
136 insertions (15/17, positive control excluded) are located in intronic, 3'UTR, promoter or even  
137 intergenic sequences. As a sufficient coverage at sequencing is essential to allow the  
138 identification of polymorphic retrotransposons in the non-coding regions, we wanted to estimate

139 the number of false negative carriers of such highly confident retrotransposition mediated  
140 insertions among the 65 samples we investigated. Therefore, all samples were rescreened for the  
141 presence of the 18 IN SILICO identified insertion types using IGV (see Table 1). All insertions  
142 identified with the IN SILICO pipeline could be confirmed with IGV analysis (no false  
143 positives). As expected, IGV inspection revealed higher rates of carriers for 9 insertions (Table  
144 1). In two cases, insertion carriership was even observed in 50% of the samples, with IGV and  
145 IN SILICO data discrepancies being well explainable by the low coverage at sequencing. Of  
146 note, about half of the high confident retrotransposon insertions we identified are reported in the  
147 database of retrotransposon insertion polymorphisms in human (dbRIP, see Table 1).

148

#### 149 **Retrotransposon insertions in non-coding regions can affect allelic expression**

150 To investigate the potential consequences of Alu insertions located in non-coding gene regions at  
151 the molecular level[22], we collected blood samples from available carriers (and non-carriers for  
152 control) and extracted the corresponding RNA material. Since allele specific expression levels  
153 can be monitored by Sanger sequencing only when the Alu carrier is also heterozygous for a  
154 coding SNP in the same gene, the number of suitable insAlu carriers among the 65 investigated  
155 patients was not always sufficient and additional familial BC patients were genotyped using  
156 mutation specific hemi-nested PCRs (Table 2). Sufficient blood samples could be collected to  
157 initiate the analysis of 5 Alu targeted genes (*GHR*, *GSTA5*, *NEK10*, *PTPN14* and *UPF2*).

158 Sequence analyses of the cDNA regions flanking the allele discriminating SNPs revealed that the  
159 intronic Alu insertions in *UPF2* and *NEK10* do not result in an obvious decrease or increase of  
160 the mRNA levels generated from the retrotransposon targeted allele (Figure 3). In sharp contrast,  
161 the Alu insertion in the 3'UTR of *GHR* clearly resulted in allele silencing (Figure 4A) suggesting

162 that this Alu sequence may contain sites for microRNA directed degradation, a mechanism  
163 previously proposed to explain the occurrence of evolutionary stabilized Alu derived microRNA  
164 binding sites in the 3'UTRs of specific gene[23]. Conversely, the two available carriers of the  
165 intronic Alu insertion in *PTPN14* seem to express both alleles equally well but among the three  
166 non-carriers, one expresses virtually only one allele while the two others show a reduced  
167 expression of this same allele (Figure 4B). Partial or near absolute mono-allelic expression of  
168 *PTPN14* is in agreement with a study listing this gene as a high-confidence imprinted human  
169 gene candidate with maternal expression[24]. On the other hand, the apparent loss of imprinting  
170 (LOI) observed in the Alu carriers suggests that the integration of one single Alu element into the  
171 gene sequence of the imprinted allele would be sufficient to fully reactivate this allele, which  
172 matches with earlier observations reporting a sharp inflection in SINE content at transitions from  
173 imprinted to non-imprinted genomic regions[25]. Unfortunately, differential expression of the  
174 *GSTA5* Alu containing allele (insertion occurred in the promoter region) could not be  
175 investigated due to the very low expression level of *GSTA5* in leucocytes compared to *GSTA1*  
176 and *GSTA2* (see GeneCards.org), three homologues that are hard to discriminate when using  
177 PCR based assays (only *GSTA1* and/or *GSTA2* sequences could be detected after Sanger  
178 sequencing even by using gene discriminating primers for PCR, results not shown).

179

### 180 **PolyA containing insertions without identifiable TSD**

181 In addition to the 18 high confident retrotransposition mediated insertions for which we could  
182 identify a TSD (described above), our IN SILICO pipeline also identified 14 candidate insertion  
183 sites for which a TSD could not be deduced using IGV (see Additional file 1 and Table 3). A  
184 summary of each of the targeted gene's function is presented in Additional file 2 (see also Table



185 4 for PubMed hits). A lower coverage at sequencing most probably explains the problematic  
186 discovery and characterization of these polyA containing insertions. However, for eight of them  
187 we found parts of retrotransposon sequences (7x Alu, 1x L1) by analyzing the mates of the  
188 discordantly mapped mate pairs (Table 3). In addition, 7 out of these 14 expected  
189 retrotransposition events map at the same genomic position as do elements reported in the  
190 database for Retrotransposition Insertion Polymorphisms in Humans (dbRIP[26]). Consequently  
191 10 out of the 14 polyA containing insertions can be linked to a retrotransposon, making them still  
192 strong candidate retrotransposon insertion sites with potential pathological consequences (Table  
193 3). The high rate of confirmed retrotransposon mediated insertions observed among the  
194 candidate polyA containing insertions we identified (28 out of 32) is a good indicator for the  
195 high specificity of the followed screening strategy.

196

197

## 198 **DISCUSSION**

199 De novo retrotransposition events occurring within protein coding regions are expected to be  
200 very rare as they would strongly affect protein integrity, most often in a detrimental manner [5,  
201 20, 21]. Our results fully match with these earlier observations as the only rare polymorphic  
202 retrotransposon that inserted exome wide into a coding sequence among our 65 patients (positive  
203 BRCA1 control excluded) was an Alu element into the *ZNF442* gene (a short summary of the  
204 function of all genes targeted with a high confident retransposon mediated insertion is presented  
205 in Additional file 3). A mutation specific PCR screen (see Table 2) detected this variant in only  
206 one out of 710 familial BC patients. Since this patient has North African roots, we cannot

207 exclude that the mutation is more prevalent in that region. *ZNF442* has been poorly investigated  
208 till now (see outcomes of PubMed searches for the different targeted genes in Table 5) although  
209 the gene has been reported as a good candidate driver gene for the neoplastic process of breast  
210 and colorectal cancer[27]. The second identified retrotransposition mediated event that destroys  
211 protein integrity is the *UQCR10* transcript inserting into the *Clorf194* coding sequence (creating  
212 a *UQCR10* processed pseudogene). This polymorphic insertion has been previously observed[7,  
213 28] and was present in 7 of our 65 samples. The mutant allele is unable to produce normal  
214 *Clorf194* protein, but we cannot exclude that the *UQCR10* pseudogene is expressed as a  
215 recombinant mRNA leading to overproduction of *UQCR10* protein since a near full length  
216 *UQCR10* transcript (from c.-15 till polyA tail) inserted in the 5' coding region (c.58\_70) of the  
217 *Clorf194* gene in the same orientation (Table 1). Little is known about these two genes, but none  
218 has been linked to breast cancer yet. Interestingly, two seemingly dominant heterozygous  
219 missense mutations in *Clorf194* were recently associated with Charcot-Marie-Tooth disease[29],  
220 the most common form of inherited peripheral neuropathy. The authors reported a  $Ca^{2+}$   
221 regulatory function for *Clorf194* and therefore suggested that this gene (and consequently any  
222 mutated form at it) may also be associated with other neurodegenerative disorders characterized  
223 by altered  $Ca^{2+}$  homeostasis.

224

225 The large majority of high confident retrotransposon insertions we could identify were located in  
226 non-coding regions (15 out of 17). However, such regions are not the primary targets when  
227 performing WES and consequently their coverage at sequencing will often be (very) low, or they  
228 will not be covered at all. Therefore, we believe much more intronic (near exonic) and UTR  
229 located polymorphic retrotransposons escaped our attention, the 15 ones reported herein

230 representing the tip of an iceberg. The majority of the identified retrotransposon insertions  
231 incorporated into intronic sequences, close to the intron-exon boundaries. The genes targeted by  
232 these retrotransposition events can be linked to several biochemical processes (Additional file 3)  
233 that might be involved in breast cancer development: they can have a tyrosine kinase activity  
234 (*NEK10*[30, 31]), a Tyrosine phosphatase activity (*PTPNI4*[32]), being involved in the  
235 ubiquitination process (*UBA6*[33]), in the posttranscriptional methylation of internal adenosine  
236 residues in eukaryotic mRNAs (*METTL3*[34, 35]), in the regulation of the nonsense mediated  
237 decay pathway (*UPF2*[36]), have a suppressive role in osteosarcoma progression (*TMIGD3*[37])  
238 or are considered as candidate tumor suppressor gene for different cancer types (*DMBT1*[38-  
239 40]). Interestingly, four of the five intronic Alu insertions occurred in antisense orientation,  
240 suggesting that these insertions might contribute to the generation of alternative transcript  
241 forms[41]. We also identified two retrotransposon insertions in 3'UTR gene regions (in *GHR* and  
242 *HSD17B12*), one in the promoter of *GSTA5* (a glutathione S transferase catalyzing the  
243 conjugation of reduced form of glutathione to xenobiotic substances for the purpose of  
244 detoxification) and three in intergenic regions (in one case with nearest gene linked to BC: *MIF*-  
245 *ASI*[42]). More convincing for their role in breast cancer predisposition is that 3 retrotransposons  
246 inserted into a gene that had been previously associated to breast cancer risk (*GHR*[43-45],  
247 *DMBT1*[46-48] and *NEK10*[49, 50]). The potential cancer risk associated to these particular  
248 mutations should be confirmed by investigating a much higher number of BC cases and controls.  
249 Furthermore, we could successfully investigate the consequences of four different Alu element  
250 insertions in non-coding gene regions at the molecular level by determining the relative  
251 expression level of the wild type versus mutant allele in leucocytes. Analysis of the Alu  
252 insertions in *NEK10* and *UPF2* did not reveal a marked decrease or increase of the mRNA levels

253 generated from the retrotransposon targeted alleles. Nevertheless, a pathogenic (or protective)  
254 contribution by these mutated alleles cannot be excluded yet, as they may for instance generate  
255 splicing alterations that cannot be detected with the performed test or may result in cell type  
256 specific effects not observed in leucocytes. Moreover, the recently revealed mechanism of onco-  
257 exaptation[51, 52] whereby cryptic regulatory elements within transposons can be epigenetically  
258 reactivated in precancerous cells may also drive cancer risk. In sharp contrast, the Alu insertion  
259 in the 3'UTR of *GHR* clearly resulted in allele silencing. Since several association studies  
260 indicated that *GHR* is implicated in breast cancer predisposition[43-45], it is tempting to  
261 designate the Alu insertion in *GHR* as (one of) the causal mutation(s) for the reported cancer risk  
262 modulation. The interpretation of the data obtained when investigating the Alu insertion in  
263 *PTPN14* was more challenging since (near) mono allelic expression was already observed in the  
264 three patients that did not carry the germline Alu insertion in *PTPN14*. Fortunately, literature  
265 digging revealed a table wherein *PTPN14* was listed as a high-confidence imprinted human gene  
266 candidate with maternal expression[24]. The LOI observed in our two Alu carriers suggests that  
267 the integration of one single Alu element into the imprinted *PTPN14* gene allele would be  
268 sufficient to fully reactivate this allele[25]. The observed LOI also suggest that both patients  
269 inherited the mutated *PTPN14* allele from their father (could not be verified) and that in case the  
270 mutated allele is maternally inherited, LOI will not be observed. Since *PTPN14* was recently  
271 identified as a mediator of the tumor suppressor activity of *p53* and regularly mutated in  
272 cancer[32], its imprinted nature and the loss of imprinting (LOI) induced by particular mutations  
273 are two elements that contribute additional levels of complexity to the molecular mechanism  
274 leading to cancer when the *PTPN14* gene is involved.

275

## 276 CONCLUSIONS

277 Our study indicates that raw WES data obtained from clinical samples (whose availability is  
278 exponentially growing) hide a manageable number of retrotransposition mediated polymorphic  
279 mutations that can be dug up when using appropriate IN SILICO tools. A significant fraction of  
280 these mutations will affect gene function, even when located outside protein coding regions, and  
281 consequently may be (one of) the pathogenic factor(s) responsible for a patient's disease. Our  
282 investigation was restricted to 65 non BRCA1/2 familial BC patients, but much more patients  
283 should be analyzed (in future genome wide) to obtain a broader view of all possible  
284 retrotransposon mediated insertions involved in the disease, and to determine their respective  
285 molecular and pathogenic consequences. Moreover, transposon mediated insertions resulting in  
286 modified breast cancer risk may also generate other clinical phenotypes. For example, the growth  
287 hormone receptor (which is encoded by the *GHR* gene) is expressed in a broad range of tissues  
288 and involved in fundamental biological processes such as growth promotion, metabolism, cell  
289 division and regeneration[53], the most typical clinical syndrome associated to GHR deficiency  
290 being dwarfism (Laron syndrome). Accordingly, the clinical consequences associated to the  
291 presence of an Alu insertion in the 3'UTR of *GHR* (which leads to allele silencing) are most  
292 probably not limited to breast cancer risk. As pathogenic retrotransposon insertions are not  
293 limited to the familial BC syndrome, the described mutation screen (or an alternative version of  
294 it, e.g. for the analysis of WES data obtained with the exome capture kit from Agilent) should be  
295 applied for all diseases with a suspected genetic etiology. Indeed, screening patients with a  
296 specific genetic disease will enrich for insertions in genes involved in that disease (in  
297 preparation). Centralized databases registering all identified polymorphic retrotransposition  
298 events should be further expanded[7, 26, 54], with inclusion of population specific allele

299 frequencies, as is the case for classical variations. In order to identify good candidate pathogenic  
300 Alu element insertions, Payer et al.[55] used the outputs of GWAS studies to restrict their search  
301 to genomic loci previously implicated in disease risk. Conversely, our data indicate that  
302 microchips should be developed allowing genome wide genotyping for the presence of this  
303 particular type of polymorphic insertions, in order to perform retrotransposition specific  
304 GWAS's for a multitude of diseases or traits. Finally, the genome wide identification and  
305 investigation of polymorphic retrotransposon insertions in clinical samples will not only lead to a  
306 better understanding of diseases, but will also contribute to elucidate more basic genetic  
307 mechanisms such as gene imprinting, and will help to evaluate the impact that de novo  
308 retrotransposition mediated insertions still have on human genome evolution.

309

310

## 311 **METHODS**

312

### 313 **Patient Material**

314 A WES study using the SeqCap EZ Exome v3.0 kit from Roche has previously been performed  
315 using blood samples from probands of 65 unrelated high risk BC families with the aim to  
316 identify classical cancer predisposing mutations (protein truncating SNPs and Indels, and splice  
317 site mutations)[17]. All patients were recruited at the UZ-Brussel hospital and met the  
318 requirements for a diagnostic *BRCA1* and *BRCA2* mutation analysis. All except one (the positive  
319 control: c.1739\_1740insAlu in *BRCA1*[13]) were negative for a pathogenic *BRCA1* or *BRCA2*  
320 mutation. A large subset of these 65 patients (57) belongs to families with at least two first

321 degree blood relatives with BC. The FastQ files generated during this previous study were reused  
322 for the present study. The genomic DNA from the positive control was resubmitted for WES  
323 analysis using the SureSelect Human All Exon V6 kit from Agilent (performed by BGI  
324 Genomics Co, China) to compare both WES approaches. In addition, blood samples obtained  
325 from 710 probands from independent non BRCA1/2 BC families (including the 65 probands  
326 used for the WES analysis) were used for a PCR based genomic screen to identify additional  
327 carriers of Alu element insertions in case insufficient samples were available for RNA analysis.

328

### 329 **Strategy for retrotransposon detection using WES-BAM files**

330 Binary alignment files (BAM files) are outputs (binary versions) of a short read aligner (e.g.  
331 BWA[56]) that can map the read pairs generated during the sequencing process (paired-end  
332 sequencing) towards a reference sequence, for instance the reference human genome (hg19). In  
333 particular circumstances, these read pairs are discordantly mapped while generated from the  
334 same small genomic fragment, meaning that the mate reads map at very different positions on the  
335 reference genome.

336 To trace retrotransposon insertions not present in the human reference sequence we used, in a  
337 first try-out, the open-source RetroSeq software described by Keane et al.[18] as this software  
338 can be run on virtually any computer[57]. This software needs as input a BAM file (we used the  
339 WES BAM file generated with a positive control sample harboring the c.1739\_1740insAlu  
340 mutation in *BRCA1*; the library was prepared using the exome capture kit SeqCap EZ Exome  
341 v3.0 from Roche), a reference genome (hg19) and a library of mobile element sequences.  
342 RetroSeq operates in two phases, the first being the discovery phase where discordantly mapped  
343 (and one end mapped) mate pairs are screened for the presence of a mobile element and in the

344 affirmative assigned to a particular type of mobile element. In the second phase (calling phase),  
345 the sequence of the anchoring mate read is used to localize the polymorphic mobile element on  
346 the reference genome. Unfortunately, when applying RetroSeq on our positive control sample we  
347 could not detect the Alu insertion in *BRCAl*. RetroSeq is primarily designed to identify non  
348 reference mobile elements in Whole Genome Sequencing data, while companies that design kits  
349 for exome enrichment try to avoid the capture of nucleotide fragment harboring repetitive  
350 sequences. To circumvent this obstacle, we decide in a first step to search not for mobile  
351 elements but for polyA stretches (settings: minimum 80 nucleotides long; 90% ID) within the  
352 discordantly mapped reads of each patient data set using the first module of the RetroSeq  
353 software (discovery phase). Among the discordantly mapped read pairs traceable in BAM files  
354 we expect to find those generated from genomic DNA fragments that contain both non reference  
355 retrotransposon sequences and exon (flanking) sequences (see Figure 1). By selecting  
356 discordantly mapped reads containing a long polyA stretch in one of the paired reads, we will  
357 only retain the junctions at the 3' end of the retrotransposon. The location of the mate of each  
358 polyA containing read identified during the discovery phase is recorded in a BED file by the  
359 RetroSeq program (together with additional information). This file can be recovered as a .tab file  
360 for further analysis (see Additional file 4 for the .tab file generated with the positive control  
361 sample saved in Excel).

362 If coverage is sufficient, several anchor reads (the mates of the polyA containing reads) are  
363 expected to align in the same genomic region. Clusters of such reads are subsequently generated  
364 when they occur within a 300 bp long genomic interval and a maximum inter read distance of  
365 200 bp. In a next step, each cluster is represented by the anchor read expected to be closest to the  
366 integration site (TSD in case of retrotransposons) while the number of reads within each cluster



367 is recorded in a separate column (duplicate reads are removed). To perform these cluster  
368 calculation steps, the patient specific .tab file generated by RetroSeq is saved in Excel format,  
369 non-relevant information is first deleted and the remaining data are pasted in the first sheet of a  
370 preformatted Excel file (provided as Additional file 5). The detailed procedure for cluster  
371 calculation is described in next section. We considered clusters with three or more anchor reads  
372 as potential candidate insertion sites and retained them for further investigation. When applying  
373 this detection strategy to our 65 BC patients, we obtained on average 987 such clusters for each  
374 individual. The positive control sample (see Additional file 6) shows 641 clusters with three or  
375 more units, with a clear cluster of 17 units at the level of the Alu insertion site in *BRCA1* (TSD is  
376 at chr17:41245809-41245825).

377 To identify and in a second step discard the clusters (genomic regions) picked up in a large  
378 fraction of individuals (e.g. false positives resulting from technical artefacts, or highly recurrent  
379 polymorphic insertions not present in the reference genome), the Excel outputs obtained from  
380 each BC patient were pooled (keeping patient ID tracked) and clusters were again generated.  
381 Candidate genomic insertion sites detected in more than 10% of the samples (corresponding to  
382 clusters with more than 6 units for the BC cohort) were identified and subtracted from the patient  
383 specific output data. After this filtering step, on average 9 clusters with 5 or more reads are  
384 obtained for each individual. Visual inspection using the IGV software revealed that the majority  
385 of the remaining candidate insertion sites are generated by the presence of a polyA stretch in the  
386 reference sequence that resulted in DNA polymerase slippage during the NGS process.  
387 Consequently, these candidate genomic insertion sites were manually tracked and listed, and  
388 used for subsequent filtering. Additional file 7 provides a preformatted Excel file to perform the  
389 combined filtering steps. After filtering, only half of the BC patient samples presented a

390 candidate insertion event (31/65). One patient presented 4 such events (Additional file 1). To  
391 minimize the possibility that these candidate insertion sites would be missed in a subset of  
392 individuals because of poorer coverage, all genomic positions identified as insertional target sites  
393 during the first screening round in any individual (positions deduced from the presence of a  
394 cluster with minimum 5 anchor reads) were re-screened for the presence of a smaller cluster (3 or  
395 4 reads) in all individuals (Additional file 1, columns M & N). Further IGV inspection allowed  
396 the identification of a TSD in a significant fraction (18/32) of the obtained candidate insertion  
397 sites, strongly suggesting that a retrotransposition event had occurred at those genomic locations  
398 (Additional file 1, column K). For validation purposes, the presence or absence of each of these  
399 18 insertions was verified in each of the 65 patients using IGV (Table 1). The recovery rates  
400 obtained IN SILICO and manually using IGV matched very well except for two insertions (the  
401 *SET* transcript in *DPP10* and an Alu element in *HSD17B12*), the discrepancies being explainable  
402 by the poor coverage at sequencing. For the identification of the inserted sequences, we used the  
403 Dfam database of repetitive DNA families[58] (<https://dfam.org/home>) and the Basic Local  
404 Alignment Search Tool (<https://blast.ncbi.nlm.nih.gov/Blast.cgi>) (Additional file 1, column I).  
405 As only small stretches of nucleotides (about 50 bp long) from the 5' end of the inserted  
406 sequences can be deduced from the WES generated data, it was not possible to further define the  
407 sub-family of the identified retrotransposons.

408 A screenshot showing read visualization by IGV of the region where the Alu insertion occurred in  
409 the positive control sample (*BRCA1*) when using the SeqCap EZ Exome v3.0 kit from Roche for  
410 exome capture is presented in Figure 2. A corresponding screenshot showing read visualization  
411 when using the SureSelect Human All Exon V6 kit from Agilent is presented in Figure 5. Note  
412 that very few discordantly mapped reads are observed when using the Agilent kit, indicating that

413 the detection strategy we described here above is unable to detect retrotransposon insertions  
414 when using the WES BAM files generated with this kit, although several other identifiers of an  
415 Alu insertion are clearly present and useable for the development of an adapted IN SILICO  
416 pipeline.

417

418 **Procedure for cluster calculation starting with the data obtained from RetroSeq:**

419 Save the RetroSeq generated tab. file in Excel format and delete the 2 last columns (the .tab file  
420 generated with the positive control sample is provided as “Additional file 4”).

421 Remove all lines not referring to an autosome or to chX (all samples are from females).

422 Sort (A>Z) according to sign in last (6<sup>th</sup>) column.

423 Select/copy all filled cells and paste in Sheet 1 (“calculate cluster”) of the preformatted Excel file  
424 for cluster calculation (Additional file 5).

425 In this Sheet 1, select for “TRUE” in column I (OR) and select/copy all filled cells in columns A  
426 to J.

427 Paste the data in Sheet 2 (“simplify cluster”), and in column A, order by “color”. Delete the  
428 entire rows corresponding to the cells with pink background (this will remove duplicates).

429 In column O (chr), deselect “blank” and select/copy all informative cells in columns O to U.

430 Paste these data in Sheet 3 (“all clusters”), and deselect “2” in column G (to keep clusters with  
431 minimum 3 reads).

432 Select/copy all filled cells and paste in Sheet 4 (annotation list, use the first column for sample  
433 ID). The positive control sample will generate 641 clusters (see Additional file 6).

434

435 **Procedure to filter out the clusters of secondary interest (false positives or clusters highly**  
436 **recurrent among patients):**

437 Based on the data we obtained from our 65 samples, we generated a table (first sheet of  
438 Additional file 7) listing (a) all clusters with minimal 3 reads that were observed in 6 or more of  
439 our patients (= clusters present ~10% or more of the samples) and (b) all clusters that resulted  
440 from the presence of a polyA stretch in the reference sequence. This table was subsequently used  
441 to identify and discard the less relevant clusters from the patient specific cluster lists (as  
442 described above). This list is provided with the only intension to familiarize with the described  
443 procedure. The content of this list can depend on the type and number of samples used for its  
444 generation (type of disease, ethnicity...) but also on the followed wet and dry bench procedures.

445

446 Select/copy all filled cells of Sheet 4 (annotation list) obtained from a patient specific cluster  
447 calculation (see above).

448 Open Sheet 1 (comm65>=6 + sample) of the preformatted Excel file for cluster filtering  
449 (Additional file 7) and paste the data (in column A) down the preexisting list.

450 Apply Sort (A>Z) on column C (start) and thereafter on column B (chr).

451 Select/copy the generated dataset and paste in Sheet 2 (calculate cluster\_com65>=6).

|

452 Select for “0” in column L (“cluster”), for “FALSE” in column K (“OR”) and for “sampleID” in  
453 column A.

454 Select/copy/paste clusters with five or more reads to the “results” Sheet 3.

455 The obtained candidate insertion sites (represented by each of the generated clusters in Sheet 3)  
456 can be manually validated by IGV inspection of the corresponding BAM files at the indicated  
457 positions.

458

#### 459 **Hemi-nested PCR’s for genomic validation and screen**

460 All uncommon Alu element insertions identified with high confidence (presence of a TSD)  
461 within or close to exonic gene sequences or promoter sequences (7 in total, see Table 1) were  
462 validated by a 2 step PCR. During the first step, and starting with an input of 6.25 ng genomic  
463 DNA, primers flanking the suspected integration site are used to generate a 200-300 bp long  
464 PCR fragment. This fragment is used as template (after 2000x dilution) for the second step of the  
465 hemi-nested PCR wherein one primer of the first step PCR is used in combination with an Alu  
466 specific primer. The first step of the nested PCR should work for all genomic DNA samples. The  
467 second step will work only when the patient is carrier of the targeted Alu insertion and the  
468 appropriate primer combination is used. Both PCR steps were run on a real-time PCR instrument  
469 (LightCycler 480 II from Roche). DNA samples from Alu carriers (and negative controls)  
470 according to our WES screen were used for validation. During the first step, an amplification  
471 with reproducible Ct and melting curve was observed with all samples while during the second  
472 step only samples with an Alu insertion gave an amplification signal (with reproducible Ct and  
473 melting curve). The obtained PCR fragments were further evaluated by agarose gel

474 electrophoresis and all showed the expected size. The primers used for PCR amplification are  
475 shown in Table 6. The Alu specific primer (Alu/Rev) is located in a well conserved region and  
476 points to the 5' extremity of the transposon. Consequently, this primer will never allow  
477 amplification of the 3' extremity (polyA tail) of the transposon. The choice of the second primer  
478 for the second step of the PCR will depend on the orientation of the Alu element compared to the  
479 orientation of the targeted gene (see Table1, 2<sup>nd</sup> column). In order to identify additional carriers  
480 of the Alu insertions characterized during the raw WES data screen, the same nested PCRs were  
481 performed on genomic DNA from 710 familial BC patients (Table 2).

482

### 483 **Genotyping at polymorphic sites**

484 To investigate whether an Alu element that integrated into the non-coding regions of a gene  
485 affects expression levels of the targeted allele, a polymorphic site allowing allelic discrimination  
486 at the cDNA level must first be identified. This was done by IGV inspection of the BAM files  
487 from patients that had revealed a polymorphic Alu insertion during our screen (Additional file 1).  
488 To increase the number of samples that could be enrolled in the allele expression study, the  
489 patients whose genomic DNA revealed an interesting Alu insertion upon mutation specific PCR  
490 analysis were genotyped for the corresponding polymorphic site. PCR primers are presented in  
491 Table 7. Heterozygosity was determined by High Resolution Melting Curve Analysis.

492

### 493 **RNA isolation, cDNA synthesis and RT-PCR**

494 RNA isolation was performed using the RNeasy Mini kit (Qiagen) with additional DNase step  
495 using manufacturer's protocol. cDNAs were prepared using Superscript II reverse transcriptase

496 (Life Sciences) using hexamer random primers and qPCR was performed using the SybrGreen

497 Master kit (Roche) on a LightCycler 480 II. Primers are presented in Table 8.

498

499 **Sequencing**

500 Purified PCR fragments were Sanger sequenced by the VIB Genetic Service Facility, from the

501 University of Antwerp.

502

503 **DECLARATIONS**

504 Ethics approval and consent to participate: Patient recruitment and blood sampling were  
505 performed according to the ethical procedures approved by the institutional ethics committee of  
506 the UZ Brussel. For the concerned cases, peripheral blood was collected after obtaining a written  
507 informed consent for a broad genomic analysis covering also incidental findings in genes  
508 predictive for other diseases.

509

510 Consent for publication: Not applicable

511

512 Availability of data and materials: a dataset allowing the reproduction of the outputs for a  
513 positive control is provided as “additional file”. Additional datasets are available on reasonable  
514 request

515

516 Competing interests: the authors declare that they have no competing interests

517

518 Funding: financial support from “Kom Op Tegen Kanker” is acknowledged

519

520 Authors’ contribution: SDB and ET conceived the project, designed and performed the  
521 experiments, interpreted the data and wrote the manuscript. JDG is responsible for patient  
522 recruitment and counselling. All authors reviewed and approved the manuscript.

|



523 Acknowledgements: not applicable

524

525 Authors' information (optional): not applicable

526

527

528

529

## 530 REFERENCES

- 531 1. Lander ES, Linton LM, Birren B, Nusbaum C, Zody MC, Baldwin J, Devon K, Dewar K, Doyle M,  
532 FitzHugh W, et al: **Initial sequencing and analysis of the human genome.** *Nature* 2001, **409**:860-  
533 921.
- 534 2. Jurka J: **Evolutionary impact of human Alu repetitive elements.** *Curr Opin Genet Dev* 2004,  
535 **14**:603-608.
- 536 3. Cordaux R, Batzer MA: **The impact of retrotransposons on human genome evolution.** *Nat Rev*  
537 *Genet* 2009, **10**:691-703.
- 538 4. Kazazian HH, Moran JV: **Mobile DNA in Health and Disease.** *N Engl J Med* 2017, **377**:361-370.
- 539 5. Rishishwar L, Wang L, Wang J, Yi SV, Lachance J, Jordan IK: **Evidence for positive selection on**  
540 **recent human transposable element insertions.** *Gene* 2018, **675**:69-79.
- 541 6. Hancks DC, Kazazian HH: **Roles for retrotransposon insertions in human disease.** *Mob DNA*  
542 2016, **7**:9.
- 543 7. Ewing AD, Ballinger TJ, Earl D, Harris CC, Ding L, Wilson RK, Haussler D, Platform BIGSAPA:  
544 **Retrotransposition of gene transcripts leads to structural variation in mammalian genomes.**  
545 *Genome Biol* 2013, **14**:R22.
- 546 8. Yoder JA, Walsh CP, Bestor TH: **Cytosine methylation and the ecology of intragenomic**  
547 **parasites.** *Trends Genet* 1997, **13**:335-340.
- 548 9. Daniel C, Behm M, Öhman M: **The role of Alu elements in the cis-regulation of RNA processing.**  
549 *Cell Mol Life Sci* 2015, **72**:4063-4076.
- 550 10. Economou-Pachnis A, Tschlis PN: **Insertion of an Alu SINE in the human homologue of the**  
551 **MLVI-2 locus.** *Nucleic Acids Res* 1985, **13**:8379-8387.
- 552 11. Kazazian HH, Wong C, Youssoufian H, Scott AF, Phillips DG, Antonarakis SE: **Haemophilia A**  
553 **resulting from de novo insertion of L1 sequences represents a novel mechanism for mutation**  
554 **in man.** *Nature* 1988, **332**:164-166.
- 555 12. Payer LM, Burns KH: **Transposable elements in human genetic disease.** *Nat Rev Genet* 2019,  
556 **20**:760-772.
- 557 13. Teugels E, De Brakeleer S, Goelen G, Lissens W, Sermijn E, De Grève J: **De novo Alu element**  
558 **insertions targeted to a sequence common to the BRCA1 and BRCA2 genes.** *Hum Mutat* 2005,  
559 **26**:284.
- 560 14. Peixoto A, Santos C, Pinheiro M, Pinto P, Soares MJ, Rocha P, Gusmão L, Amorim A, van der Hout  
561 A, Gerdes AM, et al: **International distribution and age estimation of the Portuguese BRCA2**  
562 **c.156\_157insAlu founder mutation.** *Breast Cancer Res Treat* 2011, **127**:671-679.
- 563 15. De Brakeleer S, De Grève J, Lissens W, Teugels E: **Systematic detection of pathogenic alu**  
564 **element insertions in NGS-based diagnostic screens: the BRCA1/BRCA2 example.** *Hum Mutat*  
565 2013, **34**:785-791.
- 566 16. Qian Y, Mancini-DiNardo D, Judkins T, Cox HC, Brown K, Elias M, Singh N, Daniels C, Holladay J,  
567 Coffee B, et al: **Identification of pathogenic retrotransposon insertions in cancer predisposition**  
568 **genes.** *Cancer Genet* 2017, **216-217**:159-169.
- 569 17. Shahi RB, De Brakeleer S, Caljon B, Pauwels I, Bonduelle M, Joris S, Fontaine C, Vanhoeij M, Van  
570 Dooren S, Teugels E, De Grève J: **Identification of candidate cancer predisposing variants by**  
571 **performing whole-exome sequencing on index patients from BRCA1 and BRCA2-negative**  
572 **breast cancer families.** *BMC Cancer* 2019, **19**:313.
- 573 18. Keane TM, Wong K, Adams DJ: **RetroSeq: transposable element discovery from next-**  
574 **generation sequencing data.** *Bioinformatics* 2013, **29**:389-390.

- 575 19. Robinson JT, Thorvaldsdóttir H, Winckler W, Guttman M, Lander ES, Getz G, Mesirov JP:  
576 **Integrative genomics viewer.** *Nat Biotechnol* 2011, **29**:24-26.
- 577 20. Stewart C, Kural D, Strömberg MP, Walker JA, Konkel MK, Stütz AM, Urban AE, Grubert F, Lam  
578 HY, Lee WP, et al: **A comprehensive map of mobile element insertion polymorphisms in**  
579 **humans.** *PLoS Genet* 2011, **7**:e1002236.
- 580 21. Witherspoon DJ, Zhang Y, Xing J, Watkins WS, Ha H, Batzer MA, Jorde LB: **Mobile element**  
581 **scanning (ME-Scan) identifies thousands of novel Alu insertions in diverse human populations.**  
582 *Genome Res* 2013, **23**:1170-1181.
- 583 22. Chen LL, Yang L: **ALU alternative Regulation for Gene Expression.** *Trends Cell Biol* 2017, **27**:480-  
584 490.
- 585 23. Spengler RM, Oakley CK, Davidson BL: **Functional microRNAs and target sites are created by**  
586 **lineage-specific transposition.** *Hum Mol Genet* 2014, **23**:1783-1793.
- 587 24. Luedi PP, Dietrich FS, Weidman JR, Bosko JM, Jirtle RL, Hartemink AJ: **Computational and**  
588 **experimental identification of novel human imprinted genes.** *Genome Res* 2007, **17**:1723-1730.
- 589 25. Greally JM: **Short interspersed transposable elements (SINEs) are excluded from imprinted**  
590 **regions in the human genome.** *Proc Natl Acad Sci U S A* 2002, **99**:327-332.
- 591 26. Wang J, Song L, Grover D, Azrak S, Batzer MA, Liang P: **dbRIP: a highly integrated database of**  
592 **retrotransposon insertion polymorphisms in humans.** *Hum Mutat* 2006, **27**:323-329.
- 593 27. Sjöblom T, Jones S, Wood LD, Parsons DW, Lin J, Barber TD, Mandelker D, Leary RJ, Ptak J,  
594 Silliman N, et al: **The consensus coding sequences of human breast and colorectal cancers.**  
595 *Science* 2006, **314**:268-274.
- 596 28. Olsen TK, Panagopoulos I, Gorunova L, Micci F, Andersen K, Kilen Andersen H, Meling TR, Due-  
597 Tønnessen B, Scheie D, Heim S, Brandal P: **Novel fusion genes and chimeric transcripts in**  
598 **ependymal tumors.** *Genes Chromosomes Cancer* 2016, **55**:944-953.
- 599 29. Sun SC, Ma D, Li MY, Zhang RX, Huang C, Huang HJ, Xie YZ, Wang ZJ, Liu J, Cai DC, et al:  
600 **Mutations in C1orf194, encoding a calcium regulator, cause dominant Charcot-Marie-Tooth**  
601 **disease.** *Brain* 2019, **142**:2215-2229.
- 602 30. van de Kooij B, Creixell P, van Vlimmeren A, Joughin BA, Miller CJ, Haider N, Simpson CD, Linding  
603 R, Stambolic V, Turk BE, Yaffe MB: **Comprehensive substrate specificity profiling of the human**  
604 **Nek kinome reveals unexpected signaling outputs.** *Elife* 2019, **8**.
- 605 31. Chivukula RR, Montoro DT, Leung HM, Yang J, Shamseldin HE, Taylor MS, Dougherty GW,  
606 Zariwala MA, Carson J, Daniels MLA, et al: **A human ciliopathy reveals essential functions for**  
607 **NEK10 in airway mucociliary clearance.** *Nat Med* 2020, **26**:244-251.
- 608 32. Mello SS, Valente LJ, Raj N, Seoane JA, Flowers BM, McClendon J, Bieging-Rolett KT, Lee J,  
609 Ivanochko D, Kozak MM, et al: **A p53 Super-tumor Suppressor Reveals a Tumor Suppressive**  
610 **p53-Ptpn14-Yap Axis in Pancreatic Cancer.** *Cancer Cell* 2017, **32**:460-473.e466.
- 611 33. Liu X, Sun L, Gursel DB, Cheng C, Huang S, Rademaker AW, Khan SA, Yin J, Kiyokawa H: **The non-**  
612 **canonical ubiquitin activating enzyme UBA6 suppresses epithelial-mesenchymal transition of**  
613 **mammary epithelial cells.** *Oncotarget* 2017, **8**:87480-87493.
- 614 34. Cai X, Wang X, Cao C, Gao Y, Zhang S, Yang Z, Liu Y, Zhang X, Zhang W, Ye L: **HBXIP-elevated**  
615 **methyltransferase METTL3 promotes the progression of breast cancer via inhibiting tumor**  
616 **suppressor let-7g.** *Cancer Lett* 2018, **415**:11-19.
- 617 35. Lan Q, Liu PY, Haase J, Bell JL, Hüttelmaier S, Liu T: **The Critical Role of RNA m.** *Cancer Res* 2019,  
618 **79**:1285-1292.
- 619 36. Gupta P, Li YR: **Upf proteins: highly conserved factors involved in nonsense mRNA mediated**  
620 **decay.** *Mol Biol Rep* 2018, **45**:39-55.
- 621 37. Ranjan A, Iyer SV, Iwakuma T: **Suppressive roles of A3AR and TMIGD3 i1 in osteosarcoma**  
622 **maligancy.** *Cell Cycle* 2017, **16**:903-904.

- 623 38. Mollenhauer J, Wiemann S, Scheurlen W, Korn B, Hayashi Y, Wilgenbus KK, von Deimling A,  
624 Poustka A: **DMBT1, a new member of the SRCR superfamily, on chromosome 10q25.3-26.1 is**  
625 **deleted in malignant brain tumours.** *Nat Genet* 1997, **17**:32-39.
- 626 39. Wu W, Kemp BL, Proctor ML, Gazdar AF, Minna JD, Hong WK, Mao L: **Expression of DMBT1, a**  
627 **candidate tumor suppressor gene, is frequently lost in lung cancer.** *Cancer Res* 1999, **59**:1846-  
628 1851.
- 629 40. Braidotti P, Nuciforo PG, Mollenhauer J, Poustka A, Pellegrini C, Moro A, Bulfamante G, Coggi G,  
630 Bosari S, Pietra GG: **DMBT1 expression is down-regulated in breast cancer.** *BMC Cancer* 2004,  
631 **4**:46.
- 632 41. Sorek R, Ast G, Graur D: **Alu-containing exons are alternatively spliced.** *Genome Res* 2002,  
633 **12**:1060-1067.
- 634 42. Ding J, Wu W, Yang J, Wu M: **Long non-coding RNA MIF-AS1 promotes breast cancer cell**  
635 **proliferation, migration and EMT process through regulating miR-1249-3p/HOXB8 axis.** *Pathol*  
636 *Res Pract* 2019, **215**:152376.
- 637 43. Wagner K, Hemminki K, Grzybowska E, Bermejo JL, Butkiewicz D, Pamula J, Pekala W, Försti A:  
638 **Polymorphisms in the growth hormone receptor: a case-control study in breast cancer.** *Int J*  
639 *Cancer* 2006, **118**:2903-2906.
- 640 44. Canzian F, Cox DG, Setiawan VW, Stram DO, Ziegler RG, Dossus L, Beckmann L, Blanché H,  
641 Barricarte A, Berg CD, et al: **Comprehensive analysis of common genetic variation in 61 genes**  
642 **related to steroid hormone and insulin-like growth factor-I metabolism and breast cancer risk**  
643 **in the NCI breast and prostate cancer cohort consortium.** *Hum Mol Genet* 2010, **19**:3873-3884.
- 644 45. Rudd MF, Webb EL, Matakidou A, Sellick GS, Williams RD, Bridle H, Eisen T, Houlston RS,  
645 Consortium G: **Variants in the GH-IGF axis confer susceptibility to lung cancer.** *Genome Res*  
646 2006, **16**:693-701.
- 647 46. Tchatchou S, Riedel A, Lyer S, Schmutzhard J, Strobel-Freidekind O, Gronert-Sum S, Mietag C,  
648 D'Amato M, Schlehe B, Hemminki K, et al: **Identification of a DMBT1 polymorphism associated**  
649 **with increased breast cancer risk and decreased promoter activity.** *Hum Mutat* 2010, **31**:60-66.
- 650 47. Gao C, Devarajan K, Zhou Y, Slater CM, Daly MB, Chen X: **Identifying breast cancer risk loci by**  
651 **global differential allele-specific expression (DASE) analysis in mammary epithelial**  
652 **transcriptome.** *BMC Genomics* 2012, **13**:570.
- 653 48. Blackburn AC, Hill LZ, Roberts AL, Wang J, Aud D, Jung J, Nikolcheva T, Allard J, Peltz G, Otis CN,  
654 et al: **Genetic mapping in mice identifies DMBT1 as a candidate modifier of mammary tumors**  
655 **and breast cancer risk.** *Am J Pathol* 2007, **170**:2030-2041.
- 656 49. Ahmed S, Thomas G, Ghossaini M, Healey CS, Humphreys MK, Platte R, Morrison J, Maranian  
657 M, Pooley KA, Luben R, et al: **Newly discovered breast cancer susceptibility loci on 3p24 and**  
658 **17q23.2.** *Nat Genet* 2009, **41**:585-590.
- 659 50. Decker B, Allen J, Luccarini C, Pooley KA, Shah M, Bolla MK, Wang Q, Ahmed S, Baynes C, Conroy  
660 DM, et al: **Targeted Resequencing of the Coding Sequence of 38 Genes Near Breast Cancer**  
661 **GWAS Loci in a Large Case-Control Study.** *Cancer Epidemiol Biomarkers Prev* 2019, **28**:822-825.
- 662 51. Babaian A, Mager DL: **Endogenous retroviral promoter exaptation in human cancer.** *Mob DNA*  
663 2016, **7**:24.
- 664 52. Jang HS, Shah NM, Du AY, Dailey ZZ, Pehrsson EC, Godoy PM, Zhang D, Li D, Xing X, Kim S, et al:  
665 **Transposable elements drive widespread expression of oncogenes in human cancers.** *Nat*  
666 *Genet* 2019, **51**:611-617.
- 667 53. Guevara-Aguirre J, Guevara A, Palacios I, Pérez M, Prócel P, Terán E: **GH and GHR signaling in**  
668 **human disease.** *Growth Horm IGF Res* 2018, **38**:34-38.
- 669 54. Mir AA, Philippe C, Cristofari G: **euL1db: the European database of L1HS retrotransposon**  
670 **insertions in humans.** *Nucleic Acids Res* 2015, **43**:D43-47.

- 671 55. Payer LM, Steranka JP, Yang WR, Kryatova M, Medabalimi S, Ardeljan D, Liu C, Boeke JD,  
672 Avramopoulos D, Burns KH: **Structural variants caused by *Alu* insertions are associated with**  
673 **risks for many human diseases.** *Proc Natl Acad Sci U S A* 2017, **114**:E3984-E3992.
- 674 56. Li H: **Toward better understanding of artifacts in variant calling from high-coverage samples.**  
675 *Bioinformatics* 2014, **30**:2843-2851.
- 676 57. Rishishwar L, Mariño-Ramírez L, Jordan IK: **Benchmarking computational tools for polymorphic**  
677 **transposable element detection.** *Brief Bioinform* 2017, **18**:908-918.
- 678 58. Hubley R, Finn RD, Clements J, Eddy SR, Jones TA, Bao W, Smit AF, Wheeler TJ: **The Dfam**  
679 **database of repetitive DNA families.** *Nucleic Acids Res* 2016, **44**:D81-89.

680

681

682 to be added to ref35 (bold): ...role of RNA m6A **Methylation in Cancer.**

683 (not accepted by EndNote)

684

685

686

687

688 **FIGURES (titles and legends)**

689

690 Figure 1

691 Title: Schematic representation of the “discordantly mapped read pairs” used for the detection of  
692 polymorphic retrotransposons

693 Legend: After genome fragmentation (broken arrows), size selected DNA fragments are  
694 sequenced from both ends (paired-end sequencing). DNA fragments having one breakpoint in a  
695 gene and the other breakpoint in a retrotransposon not included in the reference human genome  
696 will generate read pairs (grey filled arrows) that do not map at nearby positions on the reference  
697 genome after alignment. The discordantly mapped read pairs obtained by analysis of the full  
698 exome of a patient (traceable in the corresponding BAM file) are further selected for the  
699 presence of a long polyA stretch in one of the mate reads. An additional landmark for  
700 retrotransposition is the presence of a target site duplication (TSD) flanking the transposon.

701

702

703 Figure 2

704 Title: Screenshots of IGV outputs visualizing the Alu element insertion in the positive control  
705 sample

706 Legend: The screenshots are restricted to the genomic region where the Alu element insertion  
707 occurred (c.1739\_1740insAlu in *BRCAl*) in the positive control sample. The BAM file used for  
708 IGV visualization was generated from WES data obtained with the exome capture kit SeqCap EZ

|

709 Exome v3.0 from Roche. Group alignment is by chromosome of mate. Note the presence of a  
710 high number of reads (22) whose mate reads are located on another chromosome (encircled and  
711 labelled “A”). All those BRCA1 specific reads point in the same direction, the 3’ extremity of  
712 the Alu insertion that ends with a long polyA stretch (3 of these 22 reads already end with a  
713 small polyA stretch). Consequently, the mates of these 22 reads have a high probability to  
714 contain a long polyA stretch and to be picked up with our detection strategy. Five such  
715 discordantly mapped read pairs are sufficient to retain this particular genomic region as a  
716 candidate insertion site. Note also that a number of correctly mapped read pairs (labelled “B” and  
717 “C”) start with a sequence that do not correspond to the *BRCA1* sequence. The reads labelled  
718 “B” confirm the presence (and position) of a polyA stretch adjacent to the *BRCA1* sequence,  
719 while the reads labelled “C” allow the identification of the inserted sequence most upstream of  
720 the polyA stretch, in this case an Alu element. Inserted retrotransposon sequences can be  
721 identified making use of the Dfam [58] database (<https://dfam.org/home>), processed pseudogenes  
722 with BLAST (<https://blast.ncbi.nlm.nih.gov/Blast.cgi>). Finally, and characteristic for  
723 retrotransposition events, the inserted element is flanked by a short repeated sequence (TSD,  
724 17bp long in this case) as is indicated with label “D”. Often, a sharp increase of the coverage at  
725 the level of the TSD is observed (less pronounced in this example, see label “E”).

726

727

728 Figure 3

729 Title: Alu element insertions in *UPF2* and *NEK10* do not induce allelic up or down regulation

730 Legend: Sanger sequencing experiments were performed on RNA material obtained from blood  
731 leucocytes. The chromatograms show a nucleotide region containing a polymorphic position (a  
732 SNP, indicated by an arrow) for which all tested samples were heterozygous at the genomic  
733 level. (A) In addition to be heterozygous for c.1539A>C (rs11595168), all 5 samples were also  
734 heterozygous for the Alu insertion in the intronic region of *UPF2* (c.3408+98\_+111insAlu). The  
735 c.1539C allele is very rare and was not detected among available control samples. (B) In addition  
736 to be heterozygous for c.1674A>G (rs674303), 1 of the 4 samples was also heterozygous for the  
737 Alu insertion in the intronic region of *NEK10* (c.26+891\_908insAlu).

738

739

740 Figure 4

741 Title: Alu element insertions in *GHR* and *PTPN10* modulate allelic expression

742 Legend: Sanger sequencing experiments performed on RNA material obtained from blood  
743 leucocytes. The chromatograms show a nucleotide region containing a polymorphic position  
744 (arrow) for which the tested samples were heterozygous at the genomic level. (A) In addition to  
745 be heterozygous for c.558A>G (rs2397118), 3 of the 5 samples were also heterozygous for the  
746 Alu insertion in the 3'UTR of *GHR* (c.\*+413\_+422insAlu). Allele silencing is observed in all  
747 Alu mutation carriers. (B) In addition to be heterozygous for c.978A>G (rs7550799), 2 of the 5  
748 samples were also heterozygous for the Alu insertion in the intronic region of *PTPN14*  
749 (c.10066+35\_+44insAlu). Note that the two Alu mutation carriers express both alleles well,  
750 while one control sample (sample *PTPN14*\_ctrl1) expresses almost exclusively the G allele, the 2  
751 other control samples showing a deficit in the G allele.



752

753

754 Figure 5

755 Title: IGV visualization of the control Alu insertion using BAM file generated with the Agilent  
756 kit

757 Legend: Screenshots of IGV outputs restricted to the genomic region where the Alu element  
758 insertion occurred (c.1739\_1740insAlu in *BRCAL*) in the positive control sample. The BAM file  
759 used for IGV visualization was generated from WES data obtained with the SureSelect Human  
760 All Exon V6 kit (exome capture kit) from Agilent. Group alignment is by chromosome of mate.  
761 Note that this exome capture kit generates much less discordantly mapped read pairs than the kit  
762 from Roche (2 versus 22, compare with Figure 2). Accordingly, the required number (five) of  
763 discordantly mapped read pairs containing a long polyA track will not be reached and the  
764 insertion will not be revealed with our detection strategy. Note that all other characteristics  
765 observed for a retrotransposon insertion when using the exome capture kit from Roche (see  
766 Figure 2) are also observed when using the kit from Agilent.

767

768 Table 1: List with the 18 high confidence retrotransposition mediated insertions detected in 65  
769 familial BC patients

| Targeted gene (region) | Location TSD (RefSeq); orientation of the insertion compared to the targeted gene | Transposed sequence | 5' extremity of the transposed sequence <sup>a</sup> | # carriers (cl_5) <sup>b</sup> | # carriers (cl_3) <sup>c</sup> | # carriers IGV <sup>d</sup> | reported in dbRIP? |
|------------------------|-----------------------------------------------------------------------------------|---------------------|------------------------------------------------------|--------------------------------|--------------------------------|-----------------------------|--------------------|
| BRCA1 (exon)           | c.1723_1739 (NM_007294); sense                                                    | Alu                 | positive control                                     | 1                              | 1                              | 1                           | yes                |
| GHR (3'UTR)            | c.*+413_+422 (NM_000163.5); antisense                                             | Alu <sup>e</sup>    | 1_42 of AluYe6                                       | 3                              | 3                              | 5                           | yes                |
| GSTA5 (promoter)       | 1,3 Kb up transcription start (NM_153699.1); antisense                            | Alu <sup>e</sup>    | 1_59 of AluYb9                                       | 4                              | 4                              | 4                           | yes                |
| METTL3 (intron)        | c.1456+69_+84 (NM_019852.5); antisense                                            | Alu <sup>e</sup>    | 1_58 of AluYd8                                       | 1                              | 1                              | 1                           | no                 |
| NEK10 (intron)         | c.26+891_+908 (CCDS77713); antisense                                              | Alu <sup>e</sup>    | 2_53 of AluYe6                                       | 1                              | 1                              | 3                           | no                 |
| PTPN14 (intron)        | c.10066+35_+44 (NM_005401.5);sense                                                | Alu <sup>e</sup>    | 1_57 of AluYd8                                       | 3                              | 4                              | 4                           | no                 |
| UPF2 (intron)          | c.3408+98_+111 (NM_080599.2); antisense                                           | Alu <sup>e</sup>    | 2_53 of AluYe6                                       | 3                              | 3                              | 3                           | no                 |
| ZNF442 (exon)          | c.1402_1413 (NM_030824.3); antisense                                              | Alu <sup>e</sup>    | 1_47 of AluSx3                                       | 1                              | 1                              | 1                           | no                 |
| TMIGD3 (intron)        | c.458-623_-638 (NM_020683.7); antisense                                           | Alu                 | 2_55 of AluYe6                                       | 1                              | 4                              | 7                           | yes                |
| intergenic             | closest gene at 10kb (GPR42)                                                      | Alu                 | 1_57 of AluYd8                                       | 2                              | 2                              | 2                           | no                 |
| intergenic             | 2 genes at 30Kb (MIF-AS1 & GSTT2B)                                                | Alu                 | 1_57 of AluYb9                                       | 1                              | 5                              | 5                           | yes                |
| HSD17B12 (3'UTR)       | c.*+642_+650 (NM_016142.3); antisense                                             | Alu                 | 1_46 of AluYe6                                       | 1                              | 4                              | 29                          | yes                |
| intergenic             | closest gene at 85kb (CLVS1)                                                      | L1                  | 2247_2296 of L1P1_orf2                               | 1                              | 4                              | 5                           | no                 |
| DMBT1 (intron)         | c.1459+48_+63 (NM_007329.2); antisense                                            | L1                  | 4_54 of L1HS                                         | 1                              | 1                              | 1                           | no                 |
| UBA6 (intron)          | c.1097+17_+25 (NM_018227.6); sense                                                | SVA                 | 731_778 of SVA_F                                     | 1                              | 1                              | 1                           | no                 |
| C1orf194 (exon)        | c.58_70 (NM_001122961.1); sense                                                   | UQCR10              | starts at c.-15 (NM_013387.4)                        | 1                              | 4                              | 7                           | pseudogene         |
| PSMA7 (intron)         | c.654+95_+107 (NM_002792.4); antisense                                            | MRPL50              | starts at c.-7 (NM_019051.3)                         | 1                              | 1                              | 1                           | pseudogene         |
| DPP10 (intron)         | c.442-70581_-70595 (NM_001321907.1); antisense                                    | SET                 | starts at c.*+199 (NM_003011)                        | 1                              | 4                              | 35                          | pseudogene         |

770

771 Strong candidate integration sites are retained when generated by clusters counting at least 5  
772 polyA containing discordantly mapped read pairs, when present in less than 10% of the samples,  
773 and when a TSD is deducible upon IGV inspection in at least one patient. <sup>a</sup> indicates the number  
774 of nucleotides available to identify retrotransposon type (using the Dfam database [58]). As only  
775 about 50 nucleotides are available for transposon identification, it was not possible to define sub-  
776 classes. <sup>b</sup> indicates the number of patients (out of 65) who carry the mutation based on clusters  
777 counting at least 5 discordantly mapped read pairs. <sup>c</sup> indicates the number of patients who carry  
778 the same mutation based on clusters counting at least 3 discordantly mapped read pairs. <sup>d</sup>  
779 indicates the number of patients harboring the same mutation based upon IGV inspection. Note  
780 that for two insertions (SET in *DPP10* and Alu in *HSD17B12*) a much higher number of carriers  
781 is revealed upon IGV inspection. This discrepancy results from the poor coverage at sequencing.  
782 <sup>e</sup> indicates the Alu insertions for which a genomic hemi-nested PCR has been developed and  
783 applied for validation (see Methods).

784

785 Table 2: Results from insAlu genotyping experiments performed on 710 non related familial BC  
786 patients

| Alu targeted gene | # carriers out of 710 |
|-------------------|-----------------------|
| UPF2              | 107                   |
| PTPN14            | 10                    |
| GHR               | 17                    |
| ZNF442            | 1                     |
| METTL3            | 1                     |

787 The primers used for mutation specific PCR amplification are presented in Table 6

788

789

790

791

792

793 Table 3: List with the 14 polyA associated insertions for which a TSD could not be defined.

| Targeted gene (region) | Insertion type | Position of insertion in cDNA (RefSeq) | Position of insertion in hg19 | Retrotransposon sequence in mate? | # carriers cl_5 | # carriers cl_3 | reported in dbRIP? |
|------------------------|----------------|----------------------------------------|-------------------------------|-----------------------------------|-----------------|-----------------|--------------------|
| ANAPC16 (3'UTR)        | polyA          | c.*+397 (NM_001242546.1)               | chr10:73993271                | no                                | 2               | 2               | yes (Alu)          |
| ARHGAP1 (intron)       | polyA          | c.317+71 (NM_004308)                   | chr11:46709653                | yes (Alu)                         | 1               | 1               | no                 |
| AUH (intron)           | polyA          | c.599-122 (NM_001698)                  | chr9:94058481                 | yes (L1)                          | 1               | 4               | yes (L1)           |
| CLEC1B (intron)        | polyA          | c.438+306 (NM_016509)                  | chr12:10149139                | no                                | 1               | 2               | no                 |
| DHRS1 (intron)         | polyA          | c.374+111 (NM_138452)                  | chr14:24765604                | yes (Alu)                         | 1               | 1               | no                 |
| DYNC2H1 (intron)       | polyA          | c.6139+43 (NM_001377)                  | chr11:103048592               | yes (Alu)                         | 1               | 1               | yes (Alu)          |
| ETF1 (3'UTR)           | polyA          | c.*+2210 (NM_004730)                   | chr5:137841784                | no                                | 1               | 1               | no                 |
| GCNT1 (3'UTR)          | polyA          | c.*+2545 (NM_001490)                   | chr9:79121129                 | yes (Alu)                         | 1               | 1               | no                 |
| GSAP (intron)          | polyA          | c.1491+495 (NM_017439)                 | chr7:76980766                 | yes (Alu)                         | 1               | 1               | yes (Alu)          |
| MEOX2 (intron)         | polyA          | c.690+95 (NM_005924)                   | chr7:15666276                 | yes (Alu)                         | 1               | 1               | yes (Alu)          |
| MIER1 (3'UTR)          | polyA          | c.*+1193 (NM_020948)                   | chr1:67453349                 | no                                | 1               | 1               | no                 |
| USP38 (intron)         | polyA          | c.1210-89 (NM_032557)                  | chr4:144127097                | yes (Alu)                         | 1               | 1               | yes (Alu)          |
| intergenic             | polyA          | LINC0251 at 46kb                       | chr6:114017537                | no                                | 3               | 4               | no                 |
| intergenic             | polyA          | SPIN1 at 6,1kb                         | chr9:91099726                 | no                                | 1               | 3               | yes (Alu)          |

794 Note that for 8 of the 14 polyA containing insertion sites, a partial retrotransposon sequence

795 could be traced in the mate of at least one discordantly mapped read upon IGV inspection (5<sup>th</sup>

796 column). Screening the database for Retrotransposon Insertion Polymorphisms in Human

797 (dbRIP) at the corresponding positions confirmed the presence of a retrotransposon at 7 of the 14

798 positions (8<sup>th</sup> column).

799

800 Table 4: Number of hits obtained in PubMed when searching for the polyA targeted genes.

| PubMed domain                                             | title            | title/abstract   | title/abstract                | title/abstract                       |
|-----------------------------------------------------------|------------------|------------------|-------------------------------|--------------------------------------|
| Search terms used                                         | "all gene names" | "all gene names" | "all gene names" AND "cancer" | "all gene names" AND "breast cancer" |
| <b>gene (synonyms)<sup>a</sup></b>                        |                  |                  |                               |                                      |
| ANAPC16 (APC16, C10orf104, CENP-27, FLJ33728, bA570G20.3) | 5                | 5                | 0                             | 0                                    |
| ARHGAP1 (CDC42GAP, <del>RhoGAP</del> , p50rhoGAP)         | 31               | 93               | 15                            | 4                                    |
| <del>AUH</del>                                            | -                | -                | -                             | -                                    |
| CLEC1B (CLEC2)                                            | 9                | 49               | 6                             | 0                                    |
| DHRS1 (FLJ25430, MGC20204, SDR19C1)                       | 1                | 4                | 1                             | 0                                    |
| DYNC2H1 (DHC1b, DHC2, DNCH2, DYH1B, hdhc11)               | 26               | 86               | 4                             | 0                                    |
| ETF1 ( <del>ERF</del> , ERF1, RF1, SUP45L1, TB3-1)        | 185              | 845              | 21                            | 5                                    |
| GCNT1 (C2GNT, NACGT2, NAGCT2)                             | 8                | 124              | 35                            | 1                                    |
| GSAP (LOC54103, <del>PION</del> )                         | 6                | 31               | 1                             | 0                                    |
| MEOX2 (GAX, <del>MOX2</del> )                             | 85               | 254              | 22                            | 1                                    |
| MIER1 (KIAA1610, MI-ER1, hMI-ER1)                         | 10               | 15               | 2                             | 2                                    |
| USP38 (HP43.8KD, KIAA1891)                                | 6                | 10               | 3                             | 1                                    |
| intergenic: LINC0251 at 46kb                              | 0                | 0                | 0                             | 0                                    |
| intergenic: SPIN1 at 6kb ( <del>SPIN</del> , TDRD24)      | 18               | 34               | 14                            | 4                                    |

801 This table shows the number of hits obtained in PubMed when using as search term a specific  
802 gene or its synonym (= "all gene names") in combination with "cancer" or "breast cancer" and  
803 when restricting the search to particular domains (title or abstract). <sup>a</sup>gene names generating  
804 excessive number of false positive hits were removed (strikethrough). Search was performed on  
805 14/01/2020

806

807 Table 5: Number of hits obtained in PubMed when searching for high confidence targeted genes.

| PubMed domain<br>Search terms used                                      | title            | title/abstract   | title/abstract                   | title/abstract                          |
|-------------------------------------------------------------------------|------------------|------------------|----------------------------------|-----------------------------------------|
|                                                                         | "all gene names" | "all gene names" | "all gene names"<br>AND "cancer" | "all gene names"<br>AND "breast cancer" |
| <b>gene (synonyms)<sup>a</sup></b>                                      |                  |                  |                                  |                                         |
| BRCA1 (BRCC1, FANCS, PPP1R53, RNF53); positive control                  | 6503             | 14198            | 11505                            | 7402                                    |
| GHR (GHBP)                                                              | 208              | 2416             | 129                              | 35                                      |
| GSTA5                                                                   | 2                | 29               | 7                                | 2                                       |
| METTL3 ( <del>MTA</del> , MT-A70, Spo8)                                 | 80               | 251              | 65                               | 6                                       |
| NEK10 (FLJ32685)                                                        | 1                | 17               | 11                               | 8                                       |
| PTPN14 (PEZ)                                                            | 33               | 98               | 37                               | 6                                       |
| UPF2 (DKFZP434D222, KIAA1408, RENT2, smg-3)                             | 32               | 189              | 5                                | 0                                       |
| ZNF442 (FLJ14356)                                                       | 0                | 0                | 0                                | 0                                       |
| TMIGD3 (AD026)                                                          | 2                | 2                | 1                                | 0                                       |
| intergenic: GPR42 at 10 kb (FFAR3L, GPR41L, GPR42P)                     | 2                | 4                | 0                                | 0                                       |
| intergenic: MIF-AS1 at 30 kb (LOC284889, MIF-AS)                        | 4                | 5                | 2                                | 1                                       |
| intergenic: GSTT2B at 30kb (GSTT2P)                                     | 2                | 8                | 2                                | 0                                       |
| intergenic: CLVS1 at 85kb (CGorf212L, CRALBPL, MGC34646, RLBP1L1)       | 2                | 7                | 1                                | 0                                       |
| DMBT1 (GP340, Gp-340, <del>SALSA</del> , hensin, muclin, vomeroglandin) | 166              | 389              | 68                               | 7                                       |
| UBA6 (FLJ10808, UBE1L2)                                                 | 14               | 32               | 5                                | 1                                       |
| C1orf194                                                                | 1                | 2                | 0                                | 0                                       |
| PSMA7 ( <del>C6</del> , <del>HSPC</del> , RC6-1, XAPC7)                 | 19               | 60               | 18                               | 0                                       |
| UQCR10 (HSPC051, QCR9, UCCR7.2, UCRC) transcript in C1orf194            | 3                | 35               | 4                                | 0                                       |
| MRPL50 (FLJ20493, MRP-L50) transcript in PSMA7                          | 0                | 2                | 0                                | 0                                       |

808 This table shows the number of hits obtained in PubMed when using as search term a specific  
809 gene or its synonym (= "all gene names") in combination with "cancer" or "breast cancer" and  
810 when restricting the search to specific domains (title or abstract). <sup>a</sup>gene names generating  
811 excessive number of false positive hits were removed (strikethrough). Search was performed on  
812 13/01/2020.

813

814

815 Table 6: Primers used for the detection of 7 Alu element insertions in genomic DNA

| Primer name   | Primer sequence          | wt fragment size (bp) |
|---------------|--------------------------|-----------------------|
| PTPN14/Gen/F1 | GTGTGGTGAGCACTACTCGG     | 205                   |
| PTPN14/Gen/R1 | CTGACAGTCTAGGCCTCCAC     |                       |
| GHR/Gen/F1    | AAATCAGGTGGCTTTTGGCGG    | 275                   |
| GHR/Gen/R1    | AGAGGGGTATACCAACTGC      |                       |
| GSTA5/Gen/F1  | TGGTATAAACGGTGGTGGCA     | 286                   |
| GSTA5/Gen/R1  | TAGCTTCAACAGGCACAA       |                       |
| NEK10/DNA/F1  | AATGGCAGCTTACTTCACGG     | 240                   |
| NEK10/DNA/R1  | AGGAATTGTCTTCTCACCTTCTTT |                       |
| UPF2/E17/F    | GGAAAATGAAACCGATGAAGA    | 272                   |
| UPF2/I17/R    | GGCAAAGCCTTTTAGTATTGA    |                       |
| METTL3/Gen/F1 | CCTGTCTGCTCAGAAAACCTCG   | 249                   |
| METTL3/Gen/R1 | AGCGGATATCACACAGATCCA    |                       |
| ZNF442/Gen/F1 | GCCTCCGTATTTCTAGTTCCC    | 220                   |
| ZNF442/Gen/R1 | TTTCAGCCATGTGAGTCCTTCT   |                       |
| Alu/Rev       | TTTTTAGTAGAGACGGGGTTTC   |                       |

816

817

818 Table 7: Primers used for genotyping at polymorphic positions (for RNA study)

| Primer name   | Primer sequence           | fragment size (bp) | SNP                  |
|---------------|---------------------------|--------------------|----------------------|
| PTPN14/ex11/F | CCTCCCTGTCTATCTGGTCTTT    | 298                | rs7550799            |
| PTPN14/ex11/R | CAAGGGGGACAAAACGGGTG      |                    | c.978A>G; p.Arg326=  |
| GHR/ex6/F     | CCACCATTGCCCTCAACTG       | 187                | rs6179               |
| GHR/ex6/R     | AGGTGTAGCAACTCTTACCATT    |                    | c.558A>G; p.Gly186=  |
| GSTA5/i2/F    | GGGTGGGTTTCATAGACACTTCATA | 183                | rs2397118            |
| GSTA5/RNA/R1  | AGGGCTCTCTCCTTCATGTCT     |                    | c.163G>A; p.Val55Ile |
| NEK10/ex20/F1 | AGGTTAGAAAGCATAGTGGTCAAA  | 222                | rs674303             |
| NEK10/ex20/R1 | TGGACAAGAGCACCACAACCT     |                    | c.1674A>G; p.Gly558= |
| UPF2/ex6/F1   | ACTTTTGTGACGAGGATTTTCA    | 274                | rs11595168           |
| UPF2/ex6/R1   | GGCAAGAGCTCTGTGTGTA       |                    | c.1539A>C; p.Ser513= |

819

820

821 Table 8: Primers used for cDNA amplification (and Sanger sequencing)

| Primer name   | Primer sequence         | fragment size (bp) |
|---------------|-------------------------|--------------------|
| PTPN14/RNA/F1 | GTTGTTTGCCACACGACAC     | 308                |
| PTPN14/RNA/R1 | AGTTGACGCTGTGAACGCTA    |                    |
| GHR/RNA/S1    | ATTGCCCTCAACTGGACTTTA   | 241                |
| GHR/RNA/R1    | TGGATCTCACACGCACTTCA    |                    |
| GSTA5/RNA/F1  | GCTGCAGCTGGAGTAGAGTT    | 203                |
| GSTA5/RNA/R1  | AGGGCTCTCTCCTTCATGTCT   |                    |
| NEK10/RNA/F2  | CAGAGCCTTGAGATTTCTCTCAG | 386                |
| NEK10/RNA/R2  | TTACGCTGCTGTCTCGATCTTT  |                    |
| UPF2/RNA/F1   | TTTGTCCAGCCATCTTGTT     | 250                |
| UPF2/RNA/R1   | GTGCTGGCTTCTCATCTTC     |                    |

822

823

824 **ADDITIONAL MATERIAL > INFORMATION LIST**

825

826 Additional file 1 (Excel file)

827 Title: Strong candidates retrotransposon mediated insertion sites

828 Description: This table lists all strong candidate insertion sites detected with the RetroSeq  
829 software (minimum 5 discordantly mapped read pairs pointing to the same genomic location)  
830 and further filtered using Excel software to remove false positives and insertions occurring in  
831 more than 10% of the investigated patient samples.

832

833 Additional file 2 (Word file)

834 Title: Retrotransposon targeted genes with no TSD identified

835 Description: For each gene presumably targeted by a retrotransposition event that could not be  
836 confirmed by the presence of a TSD, a short description is given. The gene/protein descriptions  
837 provided by “Entrez Gene Summary” (<https://www.ncbi.nlm.nih.gov/gene>), by “GeneCards  
838 Summary” (<https://www.genecards.org>) and by “UniProtKB/Swiss-Prot Summary”  
839 (<https://uniprot.org>) are presented, when available.

840

841 Additional file 3 (Word file)

842 Title: Retrotransposon targeted genes with TSD identified

|

843 Description: For each gene targeted by a retrotransposition event that could be confirmed by the  
844 presence of a TSD, a short description is given. The gene/protein descriptions provided by  
845 “Entrez Gene Summary” (<https://www.ncbi.nlm.nih.gov/gene>), by “GeneCards Summary”  
846 (<https://www.genecards.org>) and by “UniProtKB/Swiss-Prot Summary” (<https://uniprot.org>) are  
847 presented, when available.

848

849 Additional file 4 (Excel file)

850 Title: RetroSeq generated list of anchor reads when using the positive control sample

851 Description: This table lists all discordantly mapped read pairs (19.674 in total) selected by the  
852 RetroSeq software when analyzing the positive control sample (patient harboring the  
853 c.1739\_1740insAlu mutation in BRCA1). The input BAM file was generated using the exome  
854 capture kit SeqCap EZ Exome v3.0 from Roche for library preparation. To be selected, one read  
855 of the discordantly mapped read pair must contain a long polyA stretch, while the position of the  
856 mate of this read on the reference genome is used for ordering the RefSeq selected read pairs.

857

858 Additional file 5 (Excel file)

859 Title: Excel file for cluster calculation

860 Description: This pre-formated Excel file can be used to extract potential retrotransposon  
861 insertion sites from lists generated with the RetroSeq software (e.g. the list presented in  
862 Additional file 4)

863

|



864 Additional file 6 (Excel file)

865 Title: Output of cluster calculation for the positive control sample

866 Description: This table lists all potential retrotransposon integration sites observed in the positive  
867 control sample (641 in total). Integration sites are retained only when 3 or more anchor reads  
868 cluster in the same genomic interval (max 300bp long).

869

870 Additional file 7 (Excel file)

871 Title: Excel file for cluster filtering

872 Description: This pre-formated Excel file allows further filtering of the potential retrotransposon  
873 integration sites (output of Additional file 5). Highly recurrent integration sites (occurring in  
874 more than 10% of the investigated population) or false positives are removed during this filtering  
875 step.

876

Figure 1

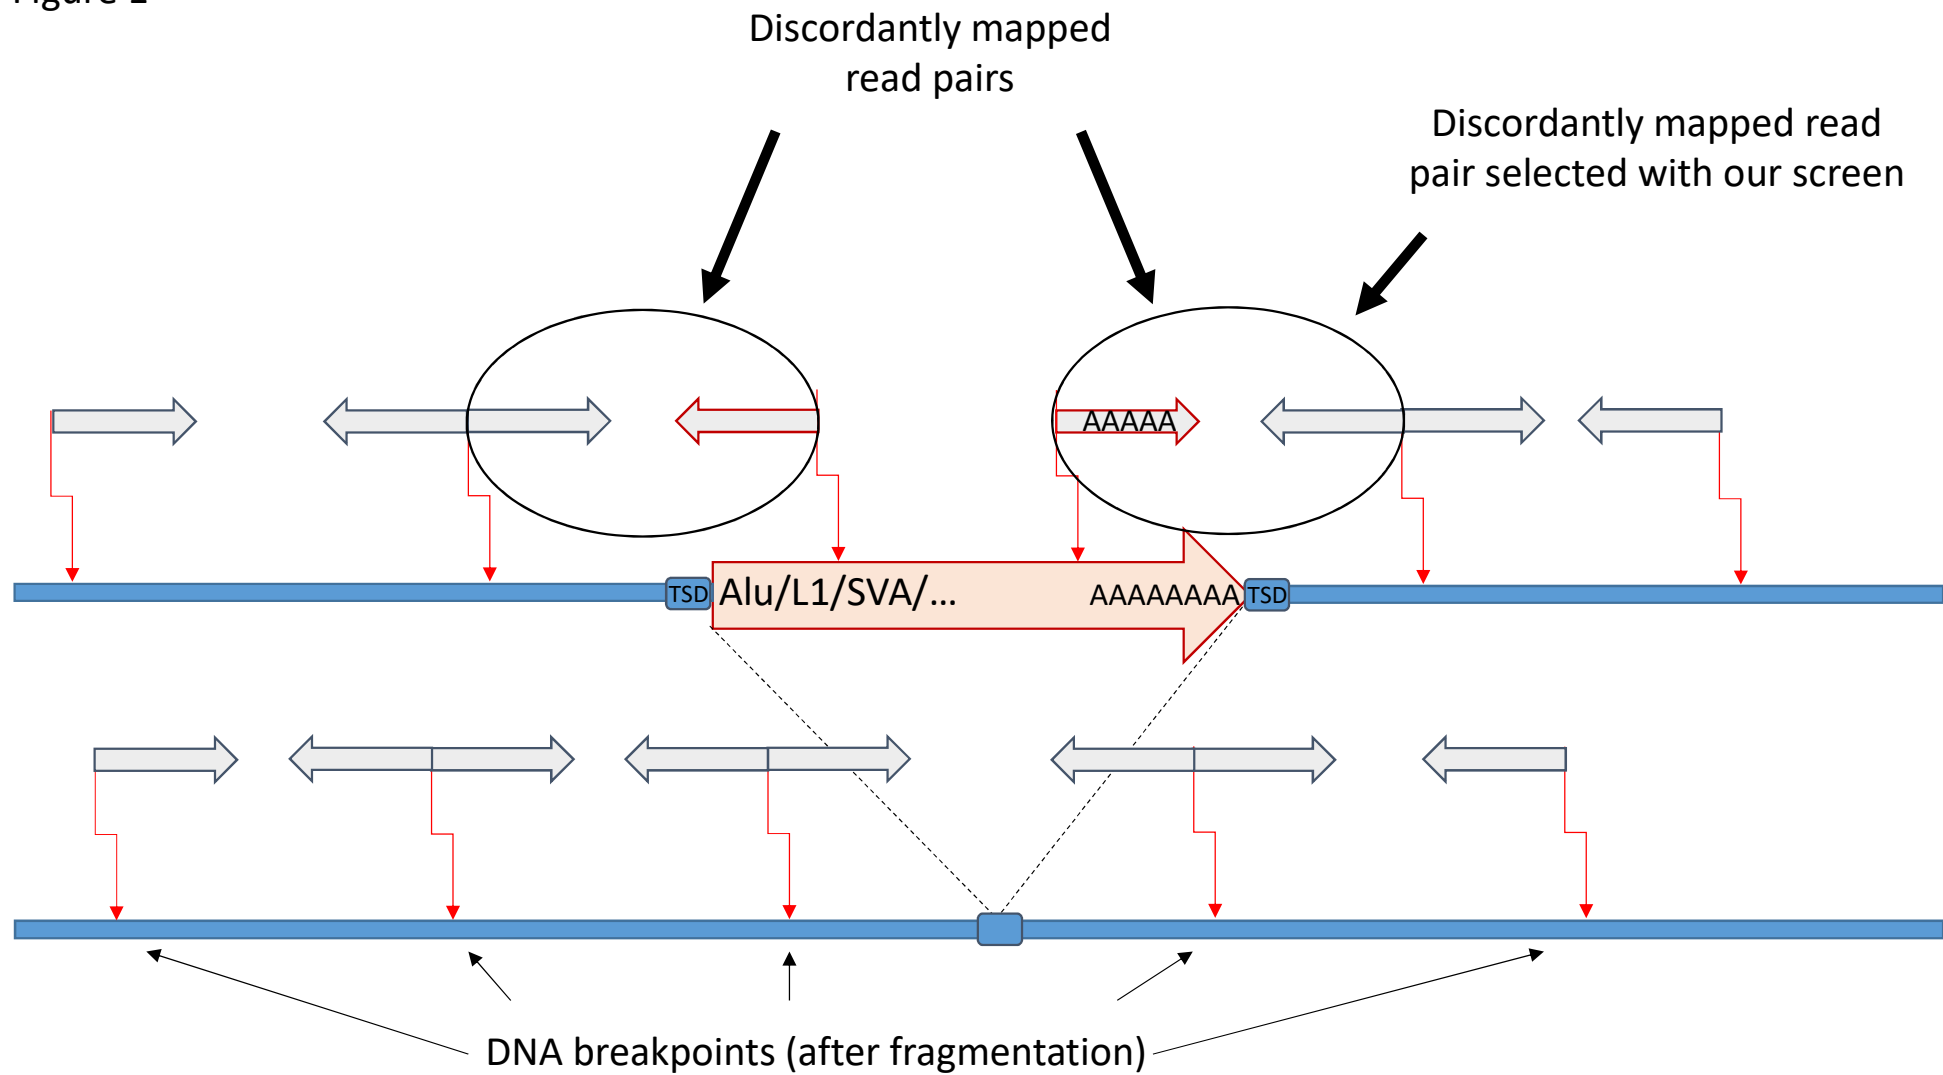

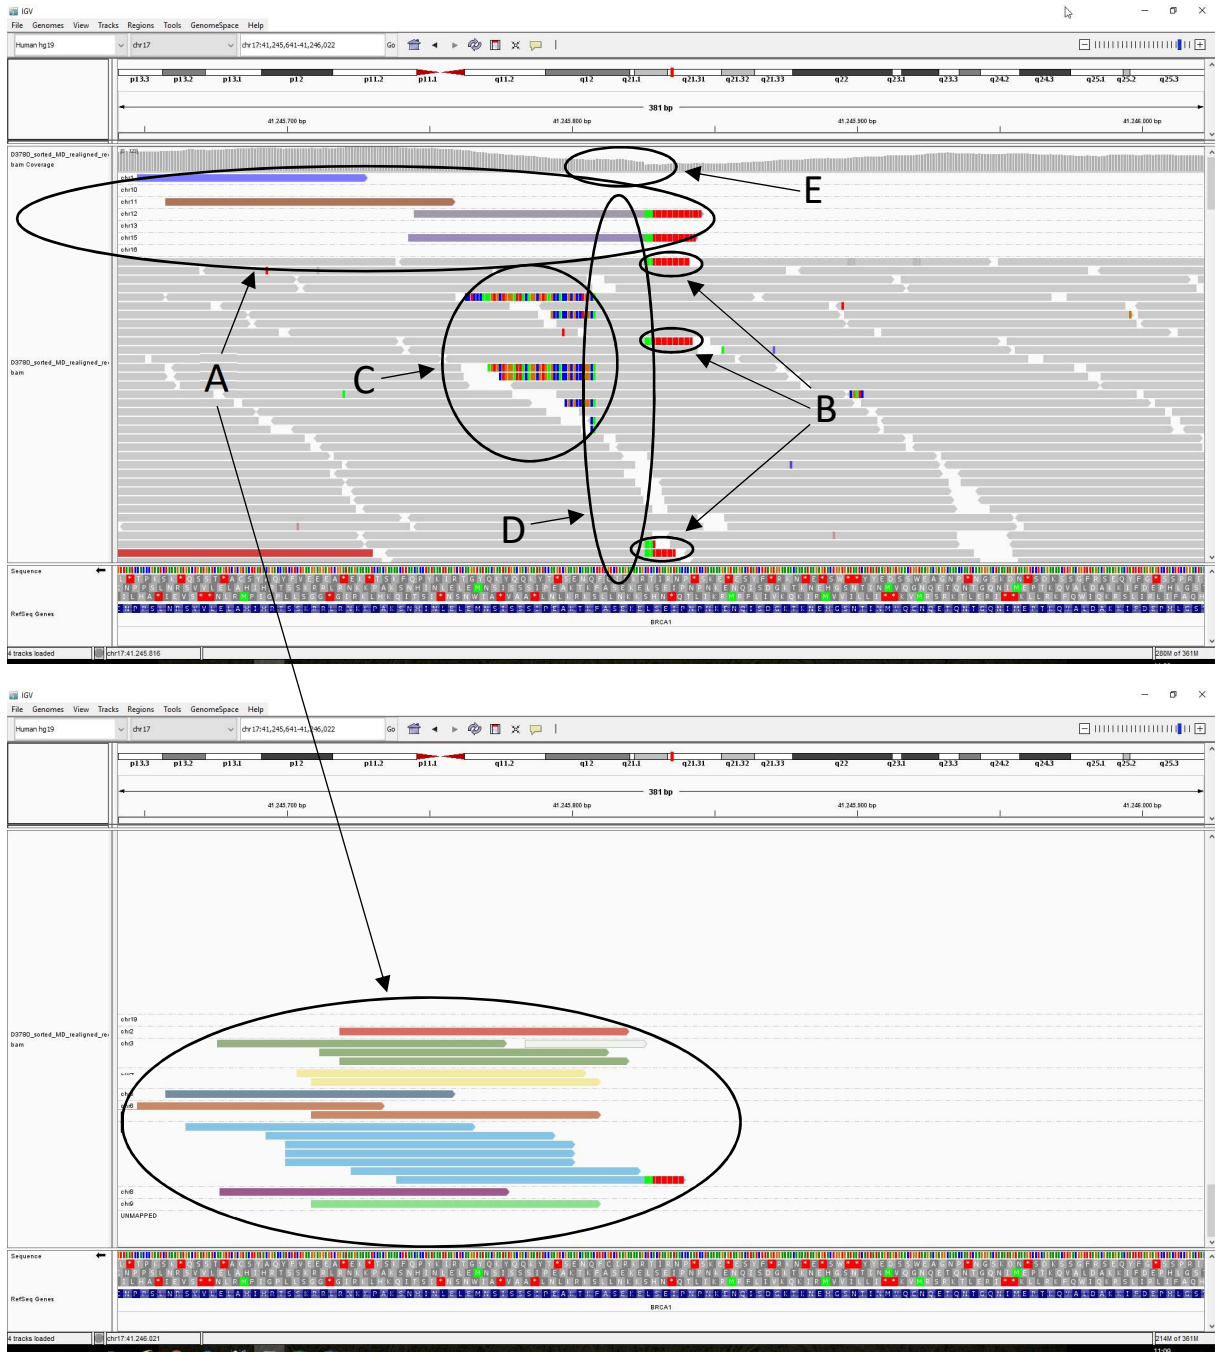

Figure 2

**A**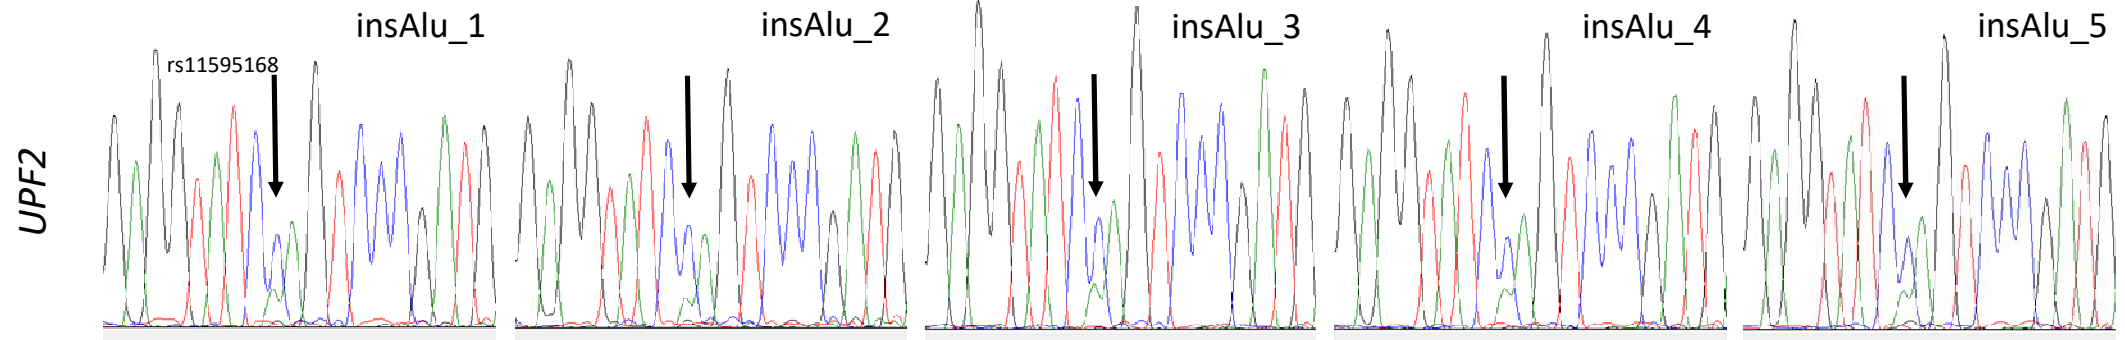**B**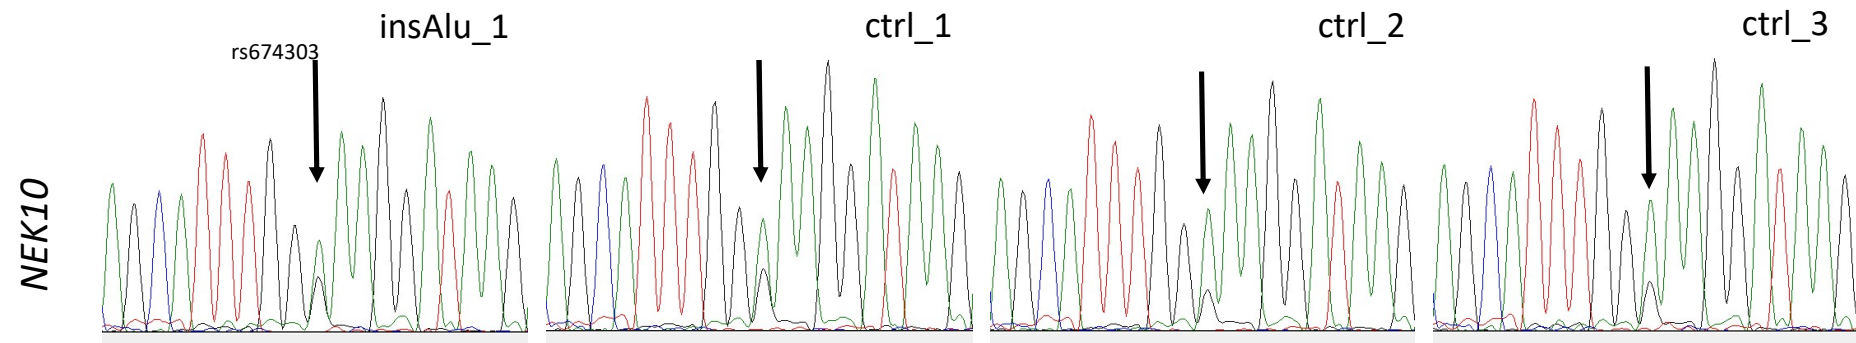

Figure 3

**A**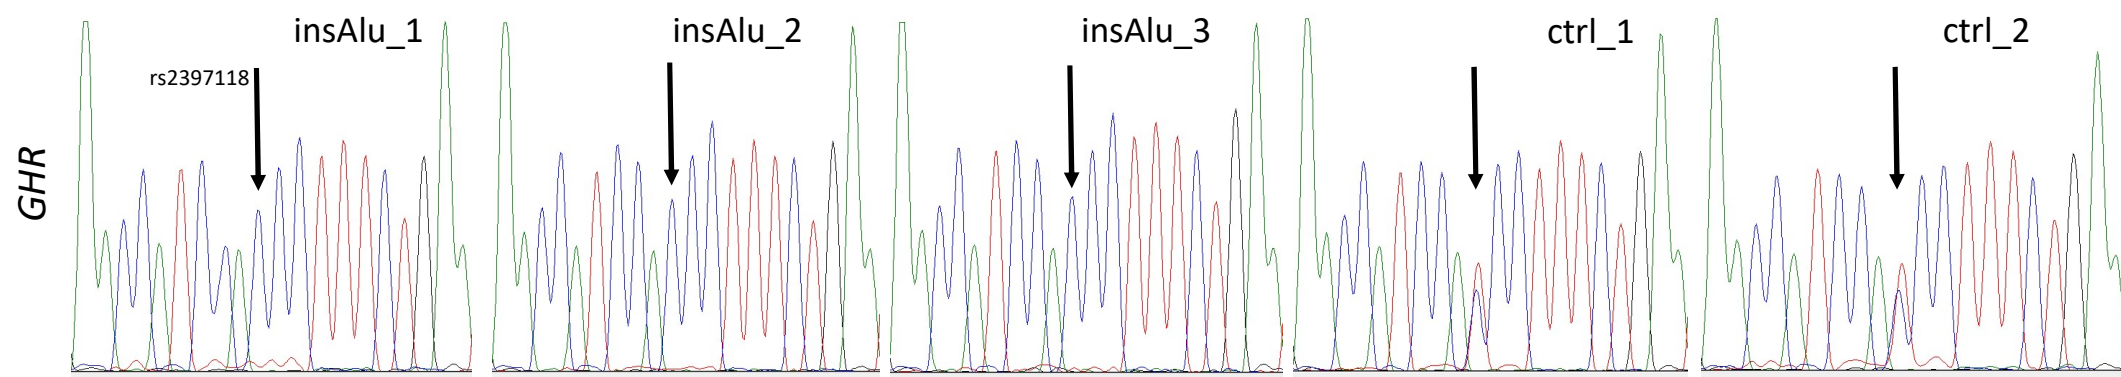**B**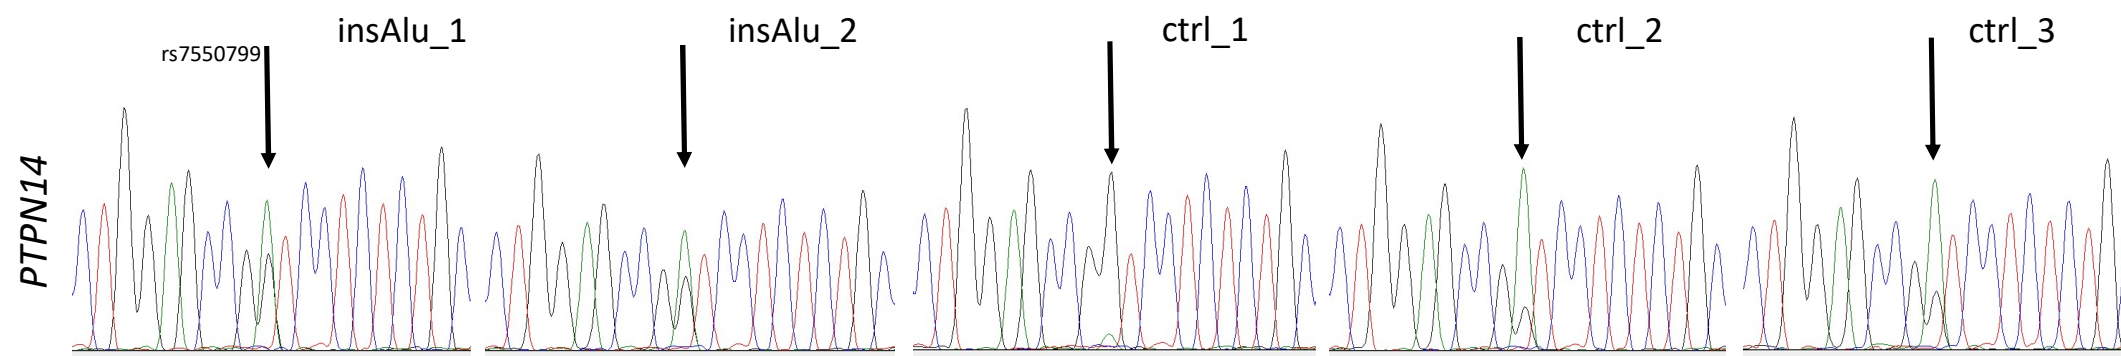

Figure 4

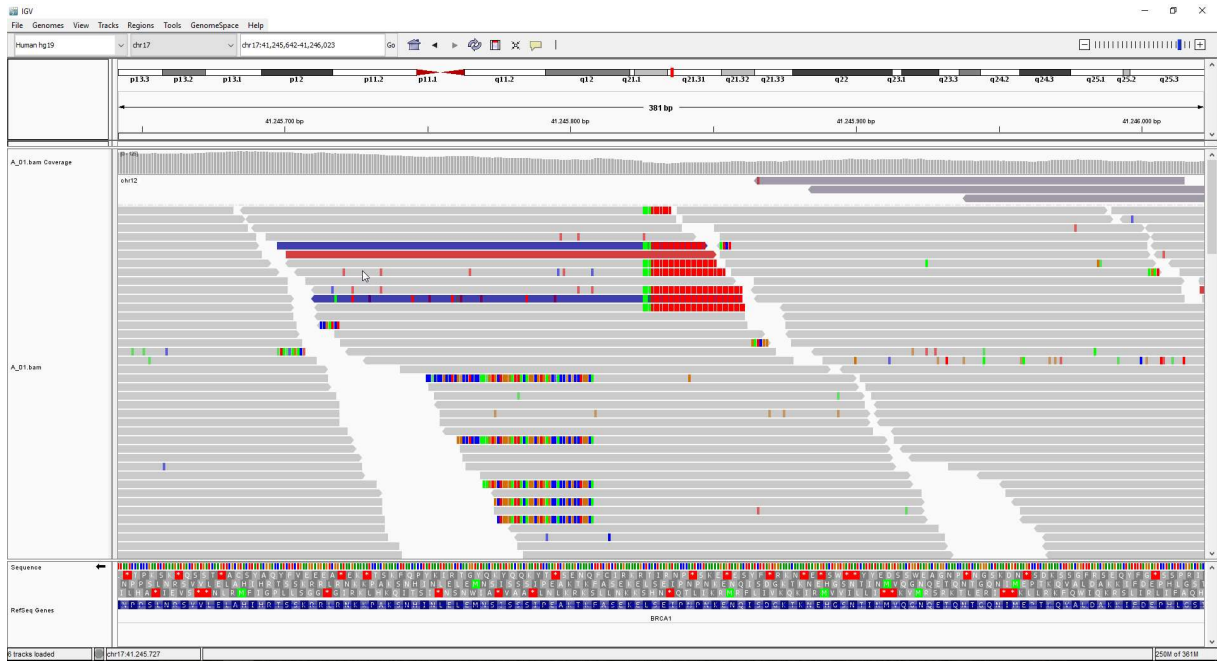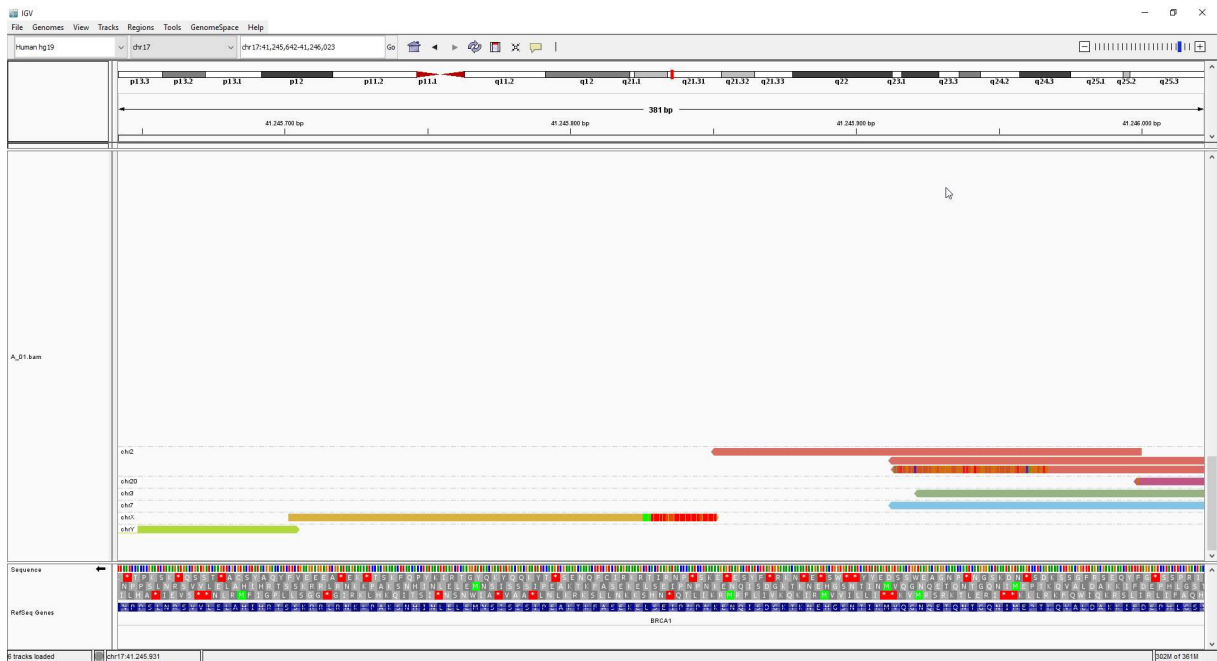

Figure 5
